# Supplementary material for: Local activation of focal adhesion kinase orchestrates the positioning of presynaptic scaffold proteins and Ca2+ signalling to control glucose-dependent insulin secretion
Source: eLife. 2022 May 13;11:e76262. doi: 10.7554/eLife.76262 (PMC9126582; doi:10.7554/eLife.76262)
Supplement: Figure 1—source data 1. [file elife-76262-fig1-data1.xlsx]

## Sheet: slices
	average pFAK %	6.39197						average pFAK %		2.74996					average pFAK %		4.16087					average pFAK %		5.79418					average pFAK %		4.44301					average pFAK %		5.88159					average pFAK %		2.64987
slice 1							slice 2							slice 3							slice 4							slice 5							slice 6							slice 7
Area:	DAPI	Insulin	Laminin	pFAK	pFAK %			DAPI	Insulin	Laminin	pFAK	pFAK %			DAPI	Insulin	Laminin	pFAK	pFAK %			DAPI	Insulin	Laminin	pFAK	pFAK %			DAPI	Insulin	Laminin	pFAK	pFAK %			DAPI	Insulin	Laminin	pFAK	pFAK %			DAPI	Insulin	Laminin	pFAK	pFAK %
c:4/4 z:1/7 - slice new setting lam pFAK ins dapi	6255.79	6801.96	1113.59	730.454	5.15445		c:4/4 z:3/24 - slice2 lam pFAK ins dapi	2576.26	9094.35	366.048	111.31	0.924758		c:4/4 z:7/20 - slice1 lam pFAK ins dapi	5161.08	8727.99	726.305	365.818	2.50297		c:4/4 z:1/17 - slice 3 lam pFAK ins dapi	4496.9	6003.18	663.971	235.849	2.11258		c:4/4 z:11/18 - slice 4 lam pFAK ins dapi	4320.1	8374.42	1569.07	350.73	2.45892		c:4/4 z:3/23 - slice 5 lam pFAK ins dapi	754.892	1956.81	140.57	58.188	2.04006		c:4/4 z:1/15 - slice islet1 lam pfak ins dapi.nd2 (series 1)	2215.59	3560.35	713.459	438.217	6.75281
c:4/4 z:2/7 - slice new setting lam pFAK ins dapi	6217.6	6016.9	1099.87	711.59	5.33651		c:4/4 z:4/24 - slice2 lam pFAK ins dapi	2771.38	9547.86	388.025	128.432	1.0107		c:4/4 z:8/20 - slice1 lam pFAK ins dapi	5156.07	8887.45	777.364	431.07	2.90853		c:4/4 z:2/17 - slice 3 lam pFAK ins dapi	4704.65	6625.51	764.684	322.36	2.66527		c:4/4 z:12/18 - slice 4 lam pFAK ins dapi	4350.5	8260.12	1612.88	475.266	3.34141		c:4/4 z:4/23 - slice 5 lam pFAK ins dapi	820.316	2025.56	188.355	80.212	2.64357		c:4/4 z:2/15 - slice islet1 lam pfak ins dapi.nd2 (series 1)	2320.09	3821.82	934.789	281.284	3.97479
c:4/4 z:3/7 - slice new setting lam pFAK ins dapi	6246.33	6923.19	1086.75	794.503	5.57301		c:4/4 z:5/24 - slice2 lam pFAK ins dapi	2974.7	9939.92	412.752	159.691	1.19822		c:4/4 z:9/20 - slice1 lam pFAK ins dapi	5146.25	9003.5	800.82	483.251	3.23232		c:4/4 z:3/17 - slice 3 lam pFAK ins dapi	4893.33	7186.32	898.277	433.746	3.34218		c:4/4 z:13/18 - slice 4 lam pFAK ins dapi	4359.32	8143.37	1657.7	595.471	4.20519		c:4/4 z:5/23 - slice 5 lam pFAK ins dapi	918.151	2085.87	200.658	97.867	3.05388		c:4/4 z:3/15 - slice islet1 lam pfak ins dapi.nd2 (series 1)	2459.83	4073.26	918.482	202.56	2.71835
c:4/4 z:4/7 - slice new setting lam pFAK ins dapi	6305.36	7721.07	1077.83	871.23	5.76811		c:4/4 z:6/24 - slice2 lam pFAK ins dapi	3174.29	10246.9	437.187	193.818	1.39857		c:4/4 z:10/20 - slice1 lam pFAK ins dapi	5136.98	9053.64	815.044	536.261	3.57372		c:4/4 z:4/17 - slice 3 lam pFAK ins dapi	5040.18	7644.28	1027	576.424	4.20396		c:4/4 z:14/18 - slice 4 lam pFAK ins dapi	4325.22	8047.4	1746.86	760.712	5.38768		c:4/4 z:6/23 - slice 5 lam pFAK ins dapi	1008.69	2169.2	173.44	105.958	3.16167		c:4/4 z:4/15 - slice islet1 lam pfak ins dapi.nd2 (series 1)	2556.34	4293.16	873.35	158.944	2.0581
c:4/4 z:5/7 - slice new setting lam pFAK ins dapi	6403.62	8375.26	1063.94	952.64	6.01308		c:4/4 z:7/24 - slice2 lam pFAK ins dapi	3347.43	10484	458.93	233.794	1.63603		c:4/4 z:11/20 - slice1 lam pFAK ins dapi	5187.07	8991.83	835.044	573.91	3.82251		c:4/4 z:5/17 - slice 3 lam pFAK ins dapi	5187.88	8077.94	1134.81	742.411	5.15541		c:4/4 z:15/18 - slice 4 lam pFAK ins dapi	4290.26	7996.46	1823.15	962.552	6.82183		c:4/4 z:7/23 - slice 5 lam pFAK ins dapi	1078.15	2270	152.54	118.624	3.38859		c:4/4 z:5/15 - slice islet1 lam pfak ins dapi.nd2 (series 1)	2669.03	4498.3	839.989	139.005	1.73597
c:4/4 z:6/7 - slice new setting lam pFAK ins dapi	6481.52	9061.37	1209.05	1268.07	7.56968		c:4/4 z:8/24 - slice2 lam pFAK ins dapi	3540.76	10748.7	443.583	268.973	1.82564		c:4/4 z:12/20 - slice1 lam pFAK ins dapi	5225.05	8819.27	842.617	613.295	4.11969		c:4/4 z:6/17 - slice 3 lam pFAK ins dapi	5343.99	8477.99	1290.96	933.891	6.17941									c:4/4 z:8/23 - slice 5 lam pFAK ins dapi	1131.27	2364.28	172.331	146.824	4.00296		c:4/4 z:6/15 - slice islet1 lam pfak ins dapi.nd2 (series 1)	2723.62	4630.95	840.662	143.1	1.74614
c:4/4 z:7/7 - slice new setting lam pFAK ins dapi	6442.08	9810.65	1250.19	1632.84	9.32897		c:4/4 z:9/24 - slice2 lam pFAK ins dapi	3744.61	10968.3	464.078	324.765	2.13985		c:4/4 z:13/20 - slice1 lam pFAK ins dapi	5259.69	8547.63	841.526	652.419	4.45372		c:4/4 z:7/17 - slice 3 lam pFAK ins dapi	5483.25	8880.2	1459.68	1181.52	7.46702									c:4/4 z:9/23 - slice 5 lam pFAK ins dapi	1157.73	2460.68	205.107	181.752	4.75353		c:4/4 z:7/15 - slice islet1 lam pfak ins dapi.nd2 (series 1)	2767.95	4541.4	881.351	152.196	1.85815
							c:4/4 z:10/24 - slice2 lam pFAK ins dapi	3894.78	11078.5	521.254	412.655	2.66322		c:4/4 z:14/20 - slice1 lam pFAK ins dapi	5244.55	8204.85	864.46	711.451	4.97037		c:4/4 z:8/17 - slice 3 lam pFAK ins dapi	5552.23	9236.52	1486.3	1502.93	9.23455									c:4/4 z:10/23 - slice 5 lam pFAK ins dapi	1170.49	2549.6	210.68	208.337	5.30016		c:4/4 z:8/15 - slice islet1 lam pfak ins dapi.nd2 (series 1)	2789.99	4145.51	945.906	160.081	2.03112
							c:4/4 z:11/24 - slice2 lam pFAK ins dapi	3959.17	11104.6	548.672	536.25	3.43475		c:4/4 z:15/20 - slice1 lam pFAK ins dapi	5202.55	7828.13	942.539	777.81	5.56643		c:4/4 z:9/17 - slice 3 lam pFAK ins dapi	5580.01	9470.63	1510.93	1952.15	11.7872									c:4/4 z:11/23 - slice 5 lam pFAK ins dapi	1176.09	2658.45	203.698	244.152	6.04599		c:4/4 z:9/15 - slice islet1 lam pfak ins dapi.nd2 (series 1)	2843.54	3741.16	1087.26	164.239	2.14077
							c:4/4 z:12/24 - slice2 lam pFAK ins dapi	3946.16	11094.2	566.769	676.421	4.33404		c:4/4 z:16/20 - slice1 lam pFAK ins dapi	5127.91	7381.02	1069.76	876.964	6.45838																c:4/4 z:12/23 - slice 5 lam pFAK ins dapi	1214.79	2781.31	209.54	277.877	6.60725		c:4/4 z:10/15 - slice islet1 lam pfak ins dapi.nd2 (series 1	2845.74	3369.38	1283.08	164.882	2.19896
							c:4/4 z:13/24 - slice2 lam pFAK ins dapi	3892.73	11088.1	606.882	851.674	5.46374																							c:4/4 z:13/23 - slice 5 lam pFAK ins dapi	1264.52	2900.9	228.049	310.146	7.05925		c:4/4 z:11/15 - slice islet1 lam pfak ins dapi.nd2 (series 1	2730.34	3101.22	1387.8	162.745	2.25429
							c:4/4 z:14/24 - slice2 lam pFAK ins dapi	3918.26	11060.8	692.821	1092.33	6.97002																							c:4/4 z:14/23 - slice 5 lam pFAK ins dapi	1318.15	2984.48	228.477	340.673	7.51853		c:4/4 z:12/15 - slice islet1 lam pfak ins dapi.nd2 (series 1	2582.37	2888.54	1405.47	162.018	2.35615
																																			c:4/4 z:15/23 - slice 5 lam pFAK ins dapi	1380.31	3032.77	238.151	366.481	7.87921		c:4/4 z:13/15 - slice islet1 lam pfak ins dapi.nd2 (series 1	2402.37	2565.22	1429.14	167.766	2.62268
																																			c:4/4 z:16/23 - slice 5 lam pFAK ins dapi	1444.11	3031.03	268.187	402.645	8.48866
																																			c:4/4 z:17/23 - slice 5 lam pFAK ins dapi	1468.65	3007.63	304.826	479.707	10.0334
																																			c:4/4 z:18/23 - slice 5 lam pFAK ins dapi	1499.02	2989.52	377.121	590.145	12.1288

## Sheet: summary
s
SLICES	average pFAK %	6.39197	2.74996	4.16087	5.79418	4.44301	5.88159	2.64987		mean	4.58164
islets		1.1202	1.20351	2.05901	1.16223	0.162101	0.192916				0.983327
										TTEST	0.000245881
										fold decrease	4.65932

## Sheet: isolated islets
	average pFAK %		1.1202					average pFAK %		1.20351					average pFAK %		2.05901					average pFAK %		1.16223					average pFAK %		0.162101					average pFAK %		0.192916
islet 1							islet 2							islet3							islet4							islet5							islet6
Area:	DAPI	Insulin	Laminin	pFAK	pFAK %			DAPI	Insulin	Laminin	pFAK	pFAK %			DAPI	Insulin	Laminin	pFAK	pFAK %			DAPI	Insulin	Laminin	pFAK	pFAK %			DAPI	Insulin	Laminin	pFAK	pFAK %			DAPI	Insulin	Laminin	pFAK	pFAK %
c:4/4 z:1/7 - isolated islet new setting lam pFAK ins dapi	2105.58	5352.01	110.159	92.143	1.21757		c:4/4 z:1/29 - islet4 lam pFAK ins dapi	1250.45	2484.89	59.171	29.225	0.77019		c:4/4 z:5/25 - islet3 lam pFAK ins dapi	3144.99	6016.82	66.412	75.15	0.81435		c:4/4 z:1/26 - islet2 lam pFAK ins dapi	3981.81	5108.71	56.513	43.057	0.470721		c:4/4 z:1/30 - isolated islet1 lam pFAK ins dapi.nd2 (series	248.733	2257.08	23.855	0.432	0.0170773		c:4/4 z:6/23 - islet1 lam pFAK ins dapi	2779.29	4756.43	8.199	2.162	0.0286589
c:4/4 z:2/7 - isolated islet new setting lam pFAK ins dapi	2110.97	5591.5	81.063	81.911	1.05236		c:4/4 z:2/29 - islet4 lam pFAK ins dapi	1247.71	2538.07	60.549	30.248	0.786413		c:4/4 z:6/25 - islet3 lam pFAK ins dapi	3209.79	6230.51	60.146	88.807	0.934767		c:4/4 z:2/26 - islet2 lam pFAK ins dapi	4087.68	5209.31	55.313	48.625	0.519925		c:4/4 z:2/30 - isolated islet1 lam pFAK ins dapi.nd2 (series	335.68	2385.67	42.478	1.19	0.0430563		c:4/4 z:7/23 - islet1 lam pFAK ins dapi	2782.81	4810.95	3.906	2.079	0.0273637
c:4/4 z:3/7 - isolated islet new setting lam pFAK ins dapi	2106.5	5754.86	90.447	81.757	1.02816		c:4/4 z:3/29 - islet4 lam pFAK ins dapi	1239.08	2604.43	60.336	31.956	0.818577		c:4/4 z:7/25 - islet3 lam pFAK ins dapi	3273.09	6392.32	47.437	102.406	1.05434		c:4/4 z:3/26 - islet2 lam pFAK ins dapi	4205.2	5317.37	58.785	50.625	0.52837		c:4/4 z:3/30 - isolated islet1 lam pFAK ins dapi.nd2 (series	404.582	2470.71	32.941	2.674	0.0919459		c:4/4 z:8/23 - islet1 lam pFAK ins dapi	2801.26	4882.07	3.175	1.88	0.0244585
c:4/4 z:4/7 - isolated islet new setting lam pFAK ins dapi	2101.72	5838.06	103.029	89.021	1.10684		c:4/4 z:4/29 - islet4 lam pFAK ins dapi	1234.69	2666.53	59.304	33.21	0.838524		c:4/4 z:8/25 - islet3 lam pFAK ins dapi	3309.18	6537.16	48.925	119.659	1.20926		c:4/4 z:4/26 - islet2 lam pFAK ins dapi	4303.69	5437.36	67.521	51.953	0.52967		c:4/4 z:4/30 - isolated islet1 lam pFAK ins dapi.nd2 (series	495.971	2477.07	27.214	2.906	0.0968585		c:4/4 z:9/23 - islet1 lam pFAK ins dapi	2847.39	4949.31	8.743	7.52	0.0963431
c:4/4 z:5/7 - isolated islet new setting lam pFAK ins dapi	2112.21	5773.76	91.776	87.46	1.0963		c:4/4 z:5/29 - islet4 lam pFAK ins dapi	1228.61	2733.78	60.941	34.846	0.866098		c:4/4 z:9/25 - islet3 lam pFAK ins dapi	3368.43	6657.82	52.79	143.682	1.42555		c:4/4 z:5/26 - islet2 lam pFAK ins dapi	4413.95	5530.85	72.049	59.345	0.592452		c:4/4 z:5/30 - isolated islet1 lam pFAK ins dapi.nd2 (series	596.561	2439.32	17.686	1.505	0.0492867		c:4/4 z:10/23 - islet1 lam pFAK ins dapi	2870.33	5045.56	13.955	8.325	0.104983
c:4/4 z:6/7 - isolated islet new setting lam pFAK ins dapi	2134.17	5803.46	94.936	85.591	1.06555		c:4/4 z:6/29 - islet4 lam pFAK ins dapi	1228.04	2795.09	59.313	35.326	0.865315		c:4/4 z:10/25 - islet3 lam pFAK ins dapi	3451.17	6755.88	54.875	178.235	1.73686		c:4/4 z:6/26 - islet2 lam pFAK ins dapi	4513.88	5607.19	72.113	67.137	0.658646		c:4/4 z:6/30 - isolated islet1 lam pFAK ins dapi.nd2 (series	704.868	2373.95	12.096	1.853	0.0599499		c:4/4 z:11/23 - islet1 lam pFAK ins dapi	2888.18	5206.17	14.738	8.189	0.100985
c:4/4 z:7/7 - isolated islet new setting lam pFAK ins dapi	2192.56	5567.49	132.664	100.601	1.27461		c:4/4 z:7/29 - islet4 lam pFAK ins dapi	1240.57	2849.49	60.087	35.086	0.845416		c:4/4 z:11/25 - islet3 lam pFAK ins dapi	3592.56	6836.18	56.597	210.446	2.00705		c:4/4 z:7/26 - islet2 lam pFAK ins dapi	4587.97	5681.54	63.409	73.745	0.71369		c:4/4 z:7/30 - isolated islet1 lam pFAK ins dapi.nd2 (series	741.462	2342.54	11.917	2.284	0.0737746		c:4/4 z:12/23 - islet1 lam pFAK ins dapi	2877.72	5377.13	17.151	9.547	0.115414
							c:4/4 z:8/29 - islet4 lam pFAK ins dapi	1249.51	2893.72	61.536	33.467	0.795931		c:4/4 z:12/25 - islet3 lam pFAK ins dapi	3756.21	6894.56	66.635	252.249	2.35364		c:4/4 z:8/26 - islet2 lam pFAK ins dapi	4627.07	5801.46	55.985	69.073	0.65881		c:4/4 z:8/30 - isolated islet1 lam pFAK ins dapi.nd2 (series	752.063	2343.87	13.012	2.621	0.084305		c:4/4 z:13/23 - islet1 lam pFAK ins dapi	2876.15	5517.57	16.702	13.098	0.155735
							c:4/4 z:9/29 - islet4 lam pFAK ins dapi	1262.49	2928.09	64.543	34.633	0.813913		c:4/4 z:13/25 - islet3 lam pFAK ins dapi	3912.31	6918.6	81.592	322.538	2.95567		c:4/4 z:9/26 - islet2 lam pFAK ins dapi	4666.72	5943.42	48.993	74.242	0.696511		c:4/4 z:9/30 - isolated islet1 lam pFAK ins dapi.nd2 (series	754.937	2303.14	13.275	3.811	0.124082		c:4/4 z:14/23 - islet1 lam pFAK ins dapi	2889.56	5617.64	13.485	12.9	0.151396
							c:4/4 z:10/29 - islet4 lam pFAK ins dapi	1272.07	2955.83	66.401	37.301	0.868617		c:4/4 z:14/25 - islet3 lam pFAK ins dapi	4013.91	6912.39	108.754	405.372	3.6735		c:4/4 z:10/26 - islet2 lam pFAK ins dapi	4679.68	6082.78	41.873	76.994	0.712622		c:4/4 z:10/30 - isolated islet1 lam pFAK ins dapi.nd2 (serie	776.697	2225.72	12.865	4.285	0.142109		c:4/4 z:15/23 - islet1 lam pFAK ins dapi	2904.03	5639.15	8.774	14.581	0.170499
							c:4/4 z:11/29 - islet4 lam pFAK ins dapi	1284.56	2983.4	69.345	40.013	0.922531		c:4/4 z:15/25 - islet3 lam pFAK ins dapi	4082.9	6862.79	139.477	497.072	4.48412		c:4/4 z:11/26 - islet2 lam pFAK ins dapi	4672.32	6237.17	39.649	83.634	0.763841		c:4/4 z:11/30 - isolated islet1 lam pFAK ins dapi.nd2 (serie	817.07	2102.47	8.317	4.074	0.139146		c:4/4 z:16/23 - islet1 lam pFAK ins dapi	2951.77	5600.97	8.252	17.746	0.207289
							c:4/4 z:12/29 - islet4 lam pFAK ins dapi	1298.5	3011.85	72.876	42.157	0.96178									c:4/4 z:12/26 - islet2 lam pFAK ins dapi	4679.71	6373.54	39.121	96.754	0.872257		c:4/4 z:12/30 - isolated islet1 lam pFAK ins dapi.nd2 (serie	891.679	2054.46	9.264	3.411	0.115416		c:4/4 z:17/23 - islet1 lam pFAK ins dapi	3007.11	5499.75	6.852	15.751	0.185007
							c:4/4 z:13/29 - islet4 lam pFAK ins dapi	1320.31	3044.53	78.034	43.34	0.975496									c:4/4 z:13/26 - islet2 lam pFAK ins dapi	4722.5	6543.16	40.465	116.386	1.02941		c:4/4 z:13/30 - isolated islet1 lam pFAK ins dapi.nd2 (serie	920.461	2122.69	10.759	4.169	0.136514		c:4/4 z:18/23 - islet1 lam pFAK ins dapi	3049.12	5399.16	4.961	13.84	0.163724
							c:4/4 z:14/29 - islet4 lam pFAK ins dapi	1341.42	3076.9	82.259	44.754	0.994405									c:4/4 z:14/26 - islet2 lam pFAK ins dapi	4796.47	6661.35	43.425	142.531	1.23927		c:4/4 z:14/30 - isolated islet1 lam pFAK ins dapi.nd2 (serie	945.379	2191.34	19.034	3.874	0.12276		c:4/4 z:19/23 - islet1 lam pFAK ins dapi	3056.88	5343.21	6.09	16.952	0.201661
							c:4/4 z:15/29 - islet4 lam pFAK ins dapi	1367.19	3101.54	86.448	48.551	1.06584									c:4/4 z:15/26 - islet2 lam pFAK ins dapi	4854.37	6738.22	45.089	165.923	1.42574		c:4/4 z:15/30 - isolated islet1 lam pFAK ins dapi.nd2 (serie	985.731	2242.74	21.687	5.053	0.15547		c:4/4 z:20/23 - islet1 lam pFAK ins dapi	3052.88	5295.56	11.249	21.141	0.252892
							c:4/4 z:16/29 - islet4 lam pFAK ins dapi	1377.7	3119.24	85.959	48.952	1.06815									c:4/4 z:16/26 - islet2 lam pFAK ins dapi	4898.15	6820.86	49.793	196.228	1.66736		c:4/4 z:16/30 - isolated islet1 lam pFAK ins dapi.nd2 (serie	1096.32	2257.38	20.487	8.096	0.239939		c:4/4 z:21/23 - islet1 lam pFAK ins dapi	3002.94	5186.91	18.718	29.654	0.361257
							c:4/4 z:17/29 - islet4 lam pFAK ins dapi	1393.21	3122.1	87.435	51.54	1.11977									c:4/4 z:17/26 - islet2 lam pFAK ins dapi	4914.4	6937.74	53.553	235.525	1.97825		c:4/4 z:17/30 - isolated islet1 lam pFAK ins dapi.nd2 (serie	1151.18	2232.19	22.234	8.254	0.242365		c:4/4 z:22/23 - islet1 lam pFAK ins dapi	2953.96	5080.85	22.133	39.618	0.491725
							c:4/4 z:18/29 - islet4 lam pFAK ins dapi	1401.16	3110.39	91.793	52.207	1.13411									c:4/4 z:18/26 - islet2 lam pFAK ins dapi	4918.72	7092.13	63.137	279.926	2.31842		c:4/4 z:18/30 - isolated islet1 lam pFAK ins dapi.nd2 (serie	1165.09	2234.26	18.781	6.938	0.202977		c:4/4 z:23/23 - islet1 lam pFAK ins dapi	2859.16	4964.74	22.812	49.677	0.633093
							c:4/4 z:19/29 - islet4 lam pFAK ins dapi	1412.25	3088.76	91.731	56.903	1.23898									c:4/4 z:19/26 - islet2 lam pFAK ins dapi	4856.24	7236.37	66.097	336.903	2.77088		c:4/4 z:19/30 - isolated islet1 lam pFAK ins dapi.nd2 (serie	1198.69	2269.22	18.602	8.401	0.240957
							c:4/4 z:20/29 - islet4 lam pFAK ins dapi	1425.85	3059.63	96.729	63.6	1.38798									c:4/4 z:20/26 - islet2 lam pFAK ins dapi	4744.62	7335.25	64.817	376.216	3.09778		c:4/4 z:20/30 - isolated islet1 lam pFAK ins dapi.nd2 (serie	1250.95	2380.21	17.528	8.18	0.22419
							c:4/4 z:21/29 - islet4 lam pFAK ins dapi	1447.25	3023.64	101.319	71.106	1.55518																c:4/4 z:21/30 - isolated islet1 lam pFAK ins dapi.nd2 (serie	1206.35	2475.11	21.897	10.306	0.278289
							c:4/4 z:22/29 - islet4 lam pFAK ins dapi	1472.05	2976.85	103.551	81.459	1.78934																c:4/4 z:22/30 - isolated islet1 lam pFAK ins dapi.nd2 (serie	1130.21	2570.82	21.108	8.401	0.225703
							c:4/4 z:23/29 - islet4 lam pFAK ins dapi	1496.88	2929.21	110.115	86.919	1.91611																c:4/4 z:23/30 - isolated islet1 lam pFAK ins dapi.nd2 (serie	1089.61	2592.51	15.886	7.99	0.216063
							c:4/4 z:24/29 - islet4 lam pFAK ins dapi	1518.99	2875.68	117.158	94.141	2.08654																c:4/4 z:24/30 - isolated islet1 lam pFAK ins dapi.nd2 (serie	1107.08	2596.96	16.591	9.233	0.248156
							c:4/4 z:25/29 - islet4 lam pFAK ins dapi	1528.33	2835.29	123.411	103.008	2.29568																c:4/4 z:25/30 - isolated islet1 lam pFAK ins dapi.nd2 (serie	1115.53	2551.36	16.97	11.001	0.298627
							c:4/4 z:26/29 - islet4 lam pFAK ins dapi	1533.72	2803.66	126.728	112.062	2.51028																c:4/4 z:26/30 - isolated islet1 lam pFAK ins dapi.nd2 (serie	1105.74	2541.21	19.36	8.917	0.243214
																												c:4/4 z:27/30 - isolated islet1 lam pFAK ins dapi.nd2 (serie	1097.43	2589.2	25.866	6.59	0.177509
																												c:4/4 z:28/30 - isolated islet1 lam pFAK ins dapi.nd2 (serie	1103.94	2588.17	31.393	7.864	0.211198
																												c:4/4 z:29/30 - isolated islet1 lam pFAK ins dapi.nd2 (serie	1075.57	2464.94	36.267	7.39	0.20661
																												c:4/4 z:30/30 - isolated islet1 lam pFAK ins dapi.nd2 (serie	917.534	2339.24	41.036	5.127	0.155467
