# Supplementary material for: Local activation of focal adhesion kinase orchestrates the positioning of presynaptic scaffold proteins and Ca2+ signalling to control glucose-dependent insulin secretion
Source: eLife. 2022 May 13;11:e76262. doi: 10.7554/eLife.76262 (PMC9126582; doi:10.7554/eLife.76262)
Supplement: Figure 1—source data 2. [file elife-76262-fig1-data2.xlsx]

## Sheet: slices
		Islets in Slices
	area
Image file (slice / stack)	Laminin	Insulin	DAPI	CD31	cell area	% total lam	% total CD31
c:1/4 z:1/5 - slice islet1 all colours.nd2 (series 1)	117.21	3028.69	1220.27	133.848	4248.96	2.75856	3.15014
c:1/4 z:2/5 - slice islet1 all colours.nd2 (series 1)	154.744	2902.17	1278.33	112.499	4180.5	3.70157	2.69104
c:1/4 z:3/5 - slice islet1 all colours.nd2 (series 1)	176.854	2780.83	1338.55	101.637	4119.39	4.29321	2.46729
c:1/4 z:4/5 - slice islet1 all colours.nd2 (series 1)	211.213	2676.23	1394.87	106.652	4071.1	5.18811	2.61974
					average for sample 1:	3.98536	2.73205
c:1/4 z:5/5 - slice islet1 all colours.nd2 (series 1)	255.256	2644.08	1435.28	120.717	4079.36	6.25726	2.95922
c:1/4 z:3/11 - slice islet2 all colours.nd2 (series 1)	229.466	2298.55	1140.58	294.027	3439.12	6.67222	8.54948
c:1/4 z:4/11 - slice islet2 all colours.nd2 (series 1)	233.44	2704.47	1182.99	226.912	3887.46	6.00495	5.83703
c:1/4 z:5/11 - slice islet2 all colours.nd2 (series 1)	264.091	3021.04	1238.73	199.982	4259.77	6.19965	4.69466
c:1/4 z:6/11 - slice islet2 all colours.nd2 (series 1)	285.921	3096.75	1290.87	172.437	4387.62	6.51654	3.93008
c:1/4 z:7/11 - slice islet2 all colours.nd2 (series 1)	305.085	3264.95	1344.63	159.18	4609.58	6.6185	3.45324
c:1/4 z:8/11 - slice islet2 all colours.nd2 (series 1)	326.139	3373.03	1424.77	158.255	4797.79	6.79769	3.2985
c:1/4 z:9/11 - slice islet2 all colours.nd2 (series 1)	334.872	3442.97	1485.58	162.089	4928.55	6.79453	3.28878
c:1/4 z:10/11 - slice islet2 all colours.nd2 (series 1)	335.763	3518.43	1552.38	158.246	5070.81	6.62149	3.12072
c:1/4 z:11/11 - slice islet2 all colours.nd2 (series 1)	350.575	3590.72	1572.75	162.878	5163.48	6.78952	3.15443
					average for sample 2:	6.52723	4.22861
c:1/4 z:1/3 - slice islet3 all colours001.nd2 (series 1)	1455.83	11989.3	5163.27	1155.62	17152.5	8.48753	6.73734
c:1/4 z:2/3 - slice islet3 all colours001.nd2 (series 1)	1550.74	12028	5399.26	1152.42	17427.3	8.89835	6.61275
c:1/4 z:3/3 - slice islet3 all colours001.nd2 (series 1)	1566.03	11969.8	5610.06	1105.13	17579.9	8.90808	6.28636
					average for sample 3:	8.76465	6.54549

## Sheet: isolated islets
		Isolated islets
	area
Image file	Laminin	Insulin	DAPI	CD31	cell area	% total lam	% total CD31
c:4/4 z:1/5 - isolated islet1 all colours.nd2 (series 1)	30.66	2448.18	1116.74	26.747	3564.93	0.860045	0.750281
c:4/4 z:2/5 - isolated islet1 all colours.nd2 (series 1)	34.69	2292.5	1190.28	34.293	3482.78	0.996043	0.984644
c:4/4 z:3/5 - isolated islet1 all colours.nd2 (series 1)	40.518	2094.74	1255.43	38.566	3350.18	1.20943	1.15116
c:4/4 z:4/5 - isolated islet1 all colours.nd2 (series 1)	46.499	1829.25	1331.96	41.419	3161.21	1.47092	1.31023
c:4/4 z:5/5 - isolated islet1 all colours.nd2 (series 1)	51.015	1592.4	1402.44	44.669	2994.84	1.70343	1.49153
					average for sample 1:	1.24797	1.13757
c:1/4 z:1/5 - isolated islet2 all colours.nd2 (series 1)	53.943	9410.9	6135.63	62.533	15546.5	0.346978	0.402231
c:1/4 z:2/5 - isolated islet2 all colours.nd2 (series 1)	61.817	9164.69	6429.94	70.703	15594.6	0.396399	0.453381
c:1/4 z:3/5 - isolated islet2 all colours.nd2 (series 1)	66.66	8813.78	6629.67	79.714	15443.5	0.431639	0.516167
c:1/4 z:4/5 - isolated islet2 all colours.nd2 (series 1)	78.367	8468.44	6960.4	93.021	15428.8	0.507925	0.602903
c:1/4 z:5/5 - isolated islet2 all colours.nd2 (series 1)	90.284	8158.26	7166.4	111.76	15324.7	0.589142	0.729282
					average for sample 2:	0.454417	0.540793
c:4/4 z:1/5 - isolated islet3 all colours.nd2 (series 1)	60.532	3553.78	1200.29	37.687	4754.08	1.27327	0.79273
c:4/4 z:2/5 - isolated islet3 all colours.nd2 (series 1)	66.885	3809.27	1281.63	43.216	5090.9	1.31381	0.848887
c:4/4 z:3/5 - isolated islet3 all colours.nd2 (series 1)	72.713	3952.47	1342.76	45.577	5295.23	1.37318	0.860718
c:4/4 z:4/5 - isolated islet3 all colours.nd2 (series 1)	77.848	4228.59	1471.3	48.388	5699.89	1.36578	0.848928
c:4/4 z:5/5 - isolated islet3 all colours.nd2 (series 1)	81.896	4488.62	1582.39	53.692	6071.01	1.34897	0.8844
					average for sample 3:	1.335	0.847133

## Sheet: summary + statistics
	Laminin			CD31
	Slice	Islet		Slice	Islet
	3.98536	1.24797		2.73205	1.13757
	6.52723	0.454417		4.22861	0.540793
	8.76465	1.335		6.54549	0.847133
means	6.42575	1.01246		4.50205	0.841832
	ttest:	0.00920879		ttest:	0.0155334
