# Supplementary material for: Local activation of focal adhesion kinase orchestrates the positioning of presynaptic scaffold proteins and Ca2+ signalling to control glucose-dependent insulin secretion
Source: eLife. 2022 May 13;11:e76262. doi: 10.7554/eLife.76262 (PMC9126582; doi:10.7554/eLife.76262)
Supplement: Figure 1—source data 3. [file elife-76262-fig1-data3.xlsx]

## Sheet: isletsliplam >50%lam in reg1
		190621 islets													190708 islets									190708 islets 2								190703 islets
Region		CELL	1	2	3	4	5	6	7	8	9	10	11
1	lamin		75.837	57.415	678.002	824.629	77.819	906.17	47.996	708.927	59.941	509.752	138.127		24.228	17.971	361.304	76.24	360.488	197.921	25.441	34.79		158.66	10.721	11.562	17.832	721.634	16.74	25.026		2.787	3.657	1.423	1.623	0.977
	liprin		922.431	890.681	930.4	1389.73	973.288	1063.82	958.712	725.838	1188.79	685.227	502.422		653.034	1178.24	924.217	1152.57	1327.26	734.582	1212.11	1367.41		960.636	604.272	1181.94	943.529	1097.22	1596.09	1915.65		1182.3	913.083	872.597	1195.94	1447.86
2	lamin		57.645	36.719	60.069	53.824	61.98	51.147	80.067	52.277	63.122	26.634	25.634		16.209	18.706	17.168	19.694	21.81	24.779	36.531	28.132		9.783	19.302	11.685	25.102	17.584	19.225	24.336		4.167	5.117	2.377	3.267	2.637
	liprin		972.973	892.801	1194.95	1118.95	1129.56	795.848	1047.98	574.101	1140.87	526.752	455.728		904.289	975.685	823.571	999.044	637.65	746.129	636.993	1136.22		750.374	678.121	680.348	839.298	588.886	888.348	1213.43		947.433	974.253	672.97	1047.49	1124.24
3	lamin		31.42	67.772	157.674	50.083	46.618	42.382	42.69	36.038	39.903	39.618	29.877		23.873	14.511	17.638	21.872	22.073	20.878	29.832	25.908		18.109	19.099	11.499	15.378	15.277	34.977	28.144		3.543	3.74	2.89	4.227	1.447
	liprin		620.123	774.145	860.493	786.638	882.951	825.085	1008.76	442.504	800.37	693.298	724.052		880.984	603.854	872.023	958.154	696.143	566.579	614.584	1047.41		925.511	646.347	974.806	763.527	743.792	1336.2	1315.3		902.667	1146.21	1175.87	1048.37	1159.01
4	lamin		86.855	43.027	59.658	41.179	40.154	47.266	37.596	18.584	44.824	33.429	17.321		26.113	20.774	17.364	14.222	13.011	20.3	21.266	27.849		13.052	11.399	15.054	15.478	20.891	16.513	32.224		4.197	4.83	2.23	9.983	2.137
	liprin		790.529	890.129	1064.48	786.292	722.393	931.167	625.011	285.807	843.983	547.588	269.862		687.413	713.431	570.053	843.359	655.382	852.432	1135.38	1303.11		891.231	608.766	1112.43	933.489	971.179	964.191	1788.3		991.457	1085.94	973.213	802.46	1108.82
sorted to have peak laminin in region 1
		190621 islets
Region		CELL	1	2	3	4	5	6	7	8	9	10	11		12	13	14	15	16	17	18	19		20	21	22	23	24	25	26
1	lamin		86.855	67.772	678.002	824.629	77.819	906.17	80.067	708.927	63.122	509.752	138.127		26.113	20.774	361.304	76.24	360.488	197.921	36.531	34.79		158.66	19.099	15.054	25.102	721.634	34.977	32.224		4.197	5.117	2.89	9.983	2.637
	liprin		790.529	774.145	930.4	1389.73	973.288	1063.82	1047.98	725.838	1140.87	685.227	502.422		687.413	713.431	924.217	1152.57	1327.26	734.582	636.993	1367.41		960.636	646.347	1112.43	839.298	1097.22	1336.2	1788.3		991.457	974.253	1175.87	802.46	1124.24
2	lamin		57.645	36.719	60.069	53.824	61.98	51.147	47.996	52.277	59.941	26.634	25.634		16.209	18.706	17.168	19.694	21.81	24.779	25.441	28.132		9.783	19.302	11.685	17.832	17.584	19.225	24.336		4.167	3.657	2.377	3.267	0.977
	liprin		972.973	892.801	1194.95	1118.95	1129.56	795.848	958.712	574.101	1188.79	526.752	455.728		904.289	975.685	823.571	999.044	637.65	746.129	1212.11	1136.22		750.374	678.121	680.348	943.529	588.886	888.348	1213.43		947.433	913.083	672.97	1047.49	1447.86
3	lamin		31.42	57.415	157.674	50.083	46.618	42.382	42.69	36.038	39.903	39.618	29.877		23.873	14.511	17.638	21.872	22.073	20.878	29.832	25.908		18.109	10.721	11.499	15.378	15.277	16.74	28.144		3.543	3.74	1.423	4.227	1.447
	liprin		620.123	890.681	860.493	786.638	882.951	825.085	1008.76	442.504	800.37	693.298	724.052		880.984	603.854	872.023	958.154	696.143	566.579	614.584	1047.41		925.511	604.272	974.806	763.527	743.792	1596.09	1315.3		902.667	1146.21	872.597	1048.37	1159.01
4	lamin		75.837	43.027	59.658	41.179	40.154	47.266	37.596	18.584	44.824	33.429	17.321		24.228	17.971	17.364	14.222	13.011	20.3	21.266	27.849		13.052	11.399	11.562	15.478	20.891	16.513	25.026		2.787	4.83	2.23	1.623	2.137
	liprin		922.431	890.129	1064.48	786.292	722.393	931.167	625.011	285.807	843.983	547.588	269.862		653.034	1178.24	570.053	843.359	655.382	852.432	1135.38	1303.11		891.231	608.766	1181.94	933.489	971.179	964.191	1915.65		1182.3	1085.94	973.213	1195.94	1108.82
as a percentage of total					1	2		3		4		5	6				7	8	9	10				11				12							13
	lamin				70.965	85.0383		86.5521		86.8968		83.6436	65.4758				87.3825	57.7453	86.3688	75.0047				79.4874				93.0677							52.267
	liprin				22.971	34.0486		29.4205		35.7864		27.9358	25.738				28.9736	29.1559	40.0206	25.3328				27.2308				32.261							19.5997
	lamin				6.28729	5.5505		4.88526		6.40786		4.37029	12.1512				4.15214	14.9165	5.22543	9.39032				4.9012				2.26777							17.1047
	liprin				29.5026	27.4144		22.0096		28.3052		21.475	23.346				25.8184	25.2722	19.227	25.7311				21.2706				17.3147							25.5843
	lamin				16.5034	5.16471		4.04808		4.41736		6.5008	14.1625				4.26581	16.5662	5.28844	7.91199				9.07246				1.97024							22.1309
	liprin				21.245	19.2728		22.8181		21.817		28.2648	37.0916				27.3373	24.2379	20.9907	19.5391				26.2351				21.8693							25.6058
	lamin				6.24428	4.24651		4.51457		2.27794		5.48526	8.2106				4.19954	10.772	3.11729	7.69295				6.53895				2.69427							8.49738
	liprin				26.2814	19.2643		25.7519		14.0913		22.3244	13.8244				17.8708	21.334	19.7617	29.397				25.2634				28.555							29.2102
		region
	lamin	1			70.965	85.0383	86.5521	86.8968	83.6436	65.4758	87.3825	57.7453	86.3688	75.0047	79.4874	93.0677	52.267
	lamin	2			6.28729	5.5505	4.88526	6.40786	4.37029	12.1512	4.15214	14.9165	5.22543	9.39032	4.9012	2.26777	17.1047
	lamin	3			16.5034	5.16471	4.04808	4.41736	6.5008	14.1625	4.26581	16.5662	5.28844	7.91199	9.07246	1.97024	22.1309
	lamin	4			6.24428	4.24651	4.51457	2.27794	5.48526	8.2106	4.19954	10.772	3.11729	7.69295	6.53895	2.69427	8.49738
	liprin	1			22.971	34.0486	29.4205	35.7864	27.9358	25.738	28.9736	29.1559	40.0206	25.3328	27.2308	32.261	19.5997
	liprin	2			29.5026	27.4144	22.0096	28.3052	21.475	23.346	25.8184	25.2722	19.227	25.7311	21.2706	17.3147	25.5843
	liprin	3			21.245	19.2728	22.8181	21.817	28.2648	37.0916	27.3373	24.2379	20.9907	19.5391	26.2351	21.8693	25.6058
	liprin	4			26.2814	19.2643	25.7519	14.0913	22.3244	13.8244	17.8708	21.334	19.7617	29.397	25.2634	28.555	29.2102

## Sheet: isletsliplam <50%lam in region1
		190621 islets													190708 islets									190708 islets 2								190703 islets
Region		CELL	1	2	3	4	5	6	7	8	9	10	11
1	lamin		75.837	57.415	678.002	824.629	77.819	906.17	47.996	708.927	59.941	509.752	138.127		24.228	17.971	361.304	76.24	360.488	197.921	25.441	34.79		158.66	10.721	11.562	17.832	721.634	16.74	25.026		2.787	3.657	1.423	1.623	0.977
	liprin		922.431	890.681	930.4	1389.73	973.288	1063.82	958.712	725.838	1188.79	685.227	502.422		653.034	1178.24	924.217	1152.57	1327.26	734.582	1212.11	1367.41		960.636	604.272	1181.94	943.529	1097.22	1596.09	1915.65		1182.3	913.083	872.597	1195.94	1447.86
2	lamin		57.645	36.719	60.069	53.824	61.98	51.147	80.067	52.277	63.122	26.634	25.634		16.209	18.706	17.168	19.694	21.81	24.779	36.531	28.132		9.783	19.302	11.685	25.102	17.584	19.225	24.336		4.167	5.117	2.377	3.267	2.637
	liprin		972.973	892.801	1194.95	1118.95	1129.56	795.848	1047.98	574.101	1140.87	526.752	455.728		904.289	975.685	823.571	999.044	637.65	746.129	636.993	1136.22		750.374	678.121	680.348	839.298	588.886	888.348	1213.43		947.433	974.253	672.97	1047.49	1124.24
3	lamin		31.42	67.772	157.674	50.083	46.618	42.382	42.69	36.038	39.903	39.618	29.877		23.873	14.511	17.638	21.872	22.073	20.878	29.832	25.908		18.109	19.099	11.499	15.378	15.277	34.977	28.144		3.543	3.74	2.89	4.227	1.447
	liprin		620.123	774.145	860.493	786.638	882.951	825.085	1008.76	442.504	800.37	693.298	724.052		880.984	603.854	872.023	958.154	696.143	566.579	614.584	1047.41		925.511	646.347	974.806	763.527	743.792	1336.2	1315.3		902.667	1146.21	1175.87	1048.37	1159.01
4	lamin		86.855	43.027	59.658	41.179	40.154	47.266	37.596	18.584	44.824	33.429	17.321		26.113	20.774	17.364	14.222	13.011	20.3	21.266	27.849		13.052	11.399	15.054	15.478	20.891	16.513	32.224		4.197	4.83	2.23	9.983	2.137
	liprin		790.529	890.129	1064.48	786.292	722.393	931.167	625.011	285.807	843.983	547.588	269.862		687.413	713.431	570.053	843.359	655.382	852.432	1135.38	1303.11		891.231	608.766	1112.43	933.489	971.179	964.191	1788.3		991.457	1085.94	973.213	802.46	1108.82
sorted to have peak laminin in region 1
		190621 islets
Region		CELL	1	2	3	4	5	6	7	8	9	10	11		12	13	14	15	16	17	18	19		20	21	22	23	24	25	26
1	lamin		86.855	67.772	678.002	824.629	77.819	906.17	80.067	708.927	63.122	509.752	138.127		26.113	20.774	361.304	76.24	360.488	197.921	36.531	34.79		158.66	19.099	15.054	25.102	721.634	34.977	32.224		4.197	5.117	2.89	9.983	2.637
	liprin		790.529	774.145	930.4	1389.73	973.288	1063.82	1047.98	725.838	1140.87	685.227	502.422		687.413	713.431	924.217	1152.57	1327.26	734.582	636.993	1367.41		960.636	646.347	1112.43	839.298	1097.22	1336.2	1788.3		991.457	974.253	1175.87	802.46	1124.24
2	lamin		57.645	36.719	60.069	53.824	61.98	51.147	47.996	52.277	59.941	26.634	25.634		16.209	18.706	17.168	19.694	21.81	24.779	25.441	28.132		9.783	19.302	11.685	17.832	17.584	19.225	24.336		4.167	3.657	2.377	3.267	0.977
	liprin		972.973	892.801	1194.95	1118.95	1129.56	795.848	958.712	574.101	1188.79	526.752	455.728		904.289	975.685	823.571	999.044	637.65	746.129	1212.11	1136.22		750.374	678.121	680.348	943.529	588.886	888.348	1213.43		947.433	913.083	672.97	1047.49	1447.86
3	lamin		31.42	57.415	157.674	50.083	46.618	42.382	42.69	36.038	39.903	39.618	29.877		23.873	14.511	17.638	21.872	22.073	20.878	29.832	25.908		18.109	10.721	11.499	15.378	15.277	16.74	28.144		3.543	3.74	1.423	4.227	1.447
	liprin		620.123	890.681	860.493	786.638	882.951	825.085	1008.76	442.504	800.37	693.298	724.052		880.984	603.854	872.023	958.154	696.143	566.579	614.584	1047.41		925.511	604.272	974.806	763.527	743.792	1596.09	1315.3		902.667	1146.21	872.597	1048.37	1159.01
4	lamin		75.837	43.027	59.658	41.179	40.154	47.266	37.596	18.584	44.824	33.429	17.321		24.228	17.971	17.364	14.222	13.011	20.3	21.266	27.849		13.052	11.399	11.562	15.478	20.891	16.513	25.026		2.787	4.83	2.23	1.623	2.137
	liprin		922.431	890.129	1064.48	786.292	722.393	931.167	625.011	285.807	843.983	547.588	269.862		653.034	1178.24	570.053	843.359	655.382	852.432	1135.38	1303.11		891.231	608.766	1181.94	933.489	971.179	964.191	1915.65		1182.3	1085.94	973.213	1195.94	1108.82
as a percentage of total			1	2			3		4		5				6	7					8	9			10	11	12		13	14		15	16	17		18
	lamin		34.4995	33.0703			34.3464		38.4293		30.3778				28.8787	28.868					32.3083	29.8168			31.5576	30.2289	34.0182		39.9943	29.3666		28.5627	29.503	32.3991		36.6352
	liprin		23.9115	22.4536			26.247		28.787		28.7084				21.9921	20.5528					17.6989	28.17			25.4717	28.1662	24.1188		27.9257	28.6924		24.6395	23.6499	31.8263		23.2284
	lamin		22.8971	17.9176			27.3557		23.0363		28.8469				17.9257	25.9943					22.5002	24.1106			31.8931	23.4639	24.1659		21.9827	22.1781		28.3585	21.0851	26.648		13.5732
	liprin		29.43	25.8951			30.4611		26.3349		29.914				28.9306	28.1079					33.6785	23.4071			26.7239	17.2261	27.1141		18.5659	19.4688		23.5454	22.165	18.2147		29.9149
	lamin		12.4803	28.0165			20.5754		20.4897		19.2035				26.4015	20.1648					26.3837	22.2045			17.7145	23.0904	20.8402		19.1413	25.6484		24.1119	21.5637	15.9529		20.1028
	liprin		18.7572	25.8336			23.8108		27.7096		20.1401				28.185	17.396					17.0762	21.5777			23.8136	24.6816	21.9414		33.3573	21.1033		22.4329	27.8242	23.6179		23.9468
	lamin		30.1231	20.9956			17.7225		18.0447		21.5718				26.7941	24.9729					18.8078	23.868			18.8348	23.2169	20.9757		18.8817	22.8069		18.9669	27.8482	25		29.6888
	liprin		27.9013	25.8176			19.481		17.1685		21.2376				20.8923	33.9433					31.5464	26.8452			23.9907	29.9261	26.8256		20.151	30.7356		29.3822	26.361	26.3411		22.9098
			100	100			100		100		100				100	100					100	100			100	100	100		100	100
			100	100			100		100		100				100	100					100	100			100	100	100		100	100
		region
	lamin	1	34.4995	33.0703	34.3464	38.4293	30.3778	28.8787	28.868	32.3083	29.8168	31.5576	30.2289	34.0182	39.9943	29.3666	28.5627	29.503	32.3991	36.6352
	lamin	2	22.8971	17.9176	27.3557	23.0363	28.8469	17.9257	25.9943	22.5002	24.1106	31.8931	23.4639	24.1659	21.9827	22.1781	28.3585	21.0851	26.648	13.5732
	lamin	3	12.4803	28.0165	20.5754	20.4897	19.2035	26.4015	20.1648	26.3837	22.2045	17.7145	23.0904	20.8402	19.1413	25.6484	24.1119	21.5637	15.9529	20.1028
	lamin	4	30.1231	20.9956	17.7225	18.0447	21.5718	26.7941	24.9729	18.8078	23.868	18.8348	23.2169	20.9757	18.8817	22.8069	18.9669	27.8482	25	29.6888
	liprin	1	23.9115	22.4536	26.247	28.787	28.7084	21.9921	20.5528	17.6989	28.17	25.4717	28.1662	24.1188	27.9257	28.6924	24.6395	23.6499	31.8263	23.2284
	liprin	2	29.43	25.8951	30.4611	26.3349	29.914	28.9306	28.1079	33.6785	23.4071	26.7239	17.2261	27.1141	18.5659	19.4688	23.5454	22.165	18.2147	29.9149
	liprin	3	18.7572	25.8336	23.8108	27.7096	20.1401	28.185	17.396	17.0762	21.5777	23.8136	24.6816	21.9414	33.3573	21.1033	22.4329	27.8242	23.6179	23.9468
	liprin	4	27.9013	25.8176	19.481	17.1685	21.2376	20.8923	33.9433	31.5464	26.8452	23.9907	29.9261	26.8256	20.151	30.7356	29.3822	26.361	26.3411	22.9098

## Sheet: isletsliplam
	cross analysis - 4 ROIs across the cell and then place highest laminin signal in region 1
		190621 islets													190708 islets									190708 islets 2								190703 islets
Region		CELL	1	2	3	4	5	6	7	8	9	10	11
1	lamin		75.837	57.415	678.002	824.629	77.819	906.17	47.996	708.927	59.941	509.752	138.127		24.228	17.971	361.304	76.24	360.488	197.921	25.441	34.79		158.66	10.721	11.562	17.832	721.634	16.74	25.026		2.787	3.657	1.423	1.623	0.977
	liprin		922.431	890.681	930.4	1389.73	973.288	1063.82	958.712	725.838	1188.79	685.227	502.422		653.034	1178.24	924.217	1152.57	1327.26	734.582	1212.11	1367.41		960.636	604.272	1181.94	943.529	1097.22	1596.09	1915.65		1182.3	913.083	872.597	1195.94	1447.86
2	lamin		57.645	36.719	60.069	53.824	61.98	51.147	80.067	52.277	63.122	26.634	25.634		16.209	18.706	17.168	19.694	21.81	24.779	36.531	28.132		9.783	19.302	11.685	25.102	17.584	19.225	24.336		4.167	5.117	2.377	3.267	2.637
	liprin		972.973	892.801	1194.95	1118.95	1129.56	795.848	1047.98	574.101	1140.87	526.752	455.728		904.289	975.685	823.571	999.044	637.65	746.129	636.993	1136.22		750.374	678.121	680.348	839.298	588.886	888.348	1213.43		947.433	974.253	672.97	1047.49	1124.24
3	lamin		31.42	67.772	157.674	50.083	46.618	42.382	42.69	36.038	39.903	39.618	29.877		23.873	14.511	17.638	21.872	22.073	20.878	29.832	25.908		18.109	19.099	11.499	15.378	15.277	34.977	28.144		3.543	3.74	2.89	4.227	1.447
	liprin		620.123	774.145	860.493	786.638	882.951	825.085	1008.76	442.504	800.37	693.298	724.052		880.984	603.854	872.023	958.154	696.143	566.579	614.584	1047.41		925.511	646.347	974.806	763.527	743.792	1336.2	1315.3		902.667	1146.21	1175.87	1048.37	1159.01
4	lamin		86.855	43.027	59.658	41.179	40.154	47.266	37.596	18.584	44.824	33.429	17.321		26.113	20.774	17.364	14.222	13.011	20.3	21.266	27.849		13.052	11.399	15.054	15.478	20.891	16.513	32.224		4.197	4.83	2.23	9.983	2.137
	liprin		790.529	890.129	1064.48	786.292	722.393	931.167	625.011	285.807	843.983	547.588	269.862		687.413	713.431	570.053	843.359	655.382	852.432	1135.38	1303.11		891.231	608.766	1112.43	933.489	971.179	964.191	1788.3		991.457	1085.94	973.213	802.46	1108.82
sorted to have peak laminin in region 1
		190621 islets
Region		CELL	1	2	3	4	5	6	7	8	9	10	11		12	13	14	15	16	17	18	19		20	21	22	23	24	25	26
1	lamin		86.855	67.772	678.002	824.629	77.819	906.17	80.067	708.927	63.122	509.752	138.127		26.113	20.774	361.304	76.24	360.488	197.921	36.531	34.79		158.66	19.099	15.054	25.102	721.634	34.977	32.224		4.197	5.117	2.89	9.983	2.637
	liprin		790.529	774.145	930.4	1389.73	973.288	1063.82	1047.98	725.838	1140.87	685.227	502.422		687.413	713.431	924.217	1152.57	1327.26	734.582	636.993	1367.41		960.636	646.347	1112.43	839.298	1097.22	1336.2	1788.3		991.457	974.253	1175.87	802.46	1124.24
2	lamin		57.645	36.719	60.069	53.824	61.98	51.147	47.996	52.277	59.941	26.634	25.634		16.209	18.706	17.168	19.694	21.81	24.779	25.441	28.132		9.783	19.302	11.685	17.832	17.584	19.225	24.336		4.167	3.657	2.377	3.267	0.977
	liprin		972.973	892.801	1194.95	1118.95	1129.56	795.848	958.712	574.101	1188.79	526.752	455.728		904.289	975.685	823.571	999.044	637.65	746.129	1212.11	1136.22		750.374	678.121	680.348	943.529	588.886	888.348	1213.43		947.433	913.083	672.97	1047.49	1447.86
3	lamin		31.42	57.415	157.674	50.083	46.618	42.382	42.69	36.038	39.903	39.618	29.877		23.873	14.511	17.638	21.872	22.073	20.878	29.832	25.908		18.109	10.721	11.499	15.378	15.277	16.74	28.144		3.543	3.74	1.423	4.227	1.447
	liprin		620.123	890.681	860.493	786.638	882.951	825.085	1008.76	442.504	800.37	693.298	724.052		880.984	603.854	872.023	958.154	696.143	566.579	614.584	1047.41		925.511	604.272	974.806	763.527	743.792	1596.09	1315.3		902.667	1146.21	872.597	1048.37	1159.01
4	lamin		75.837	43.027	59.658	41.179	40.154	47.266	37.596	18.584	44.824	33.429	17.321		24.228	17.971	17.364	14.222	13.011	20.3	21.266	27.849		13.052	11.399	11.562	15.478	20.891	16.513	25.026		2.787	4.83	2.23	1.623	2.137
	liprin		922.431	890.129	1064.48	786.292	722.393	931.167	625.011	285.807	843.983	547.588	269.862		653.034	1178.24	570.053	843.359	655.382	852.432	1135.38	1303.11		891.231	608.766	1181.94	933.489	971.179	964.191	1915.65		1182.3	1085.94	973.213	1195.94	1108.82
as a percentage of total
	lamin		34.4995	33.0703	70.965	85.0383	34.3464	86.5521	38.4293	86.8968	30.3778	83.6436	65.4758		28.8787	28.868	87.3825	57.7453	86.3688	75.0047	32.3083	29.8168		79.4874	31.5576	30.2289	34.0182	93.0677	39.9943	29.3666		28.5627	29.503	32.3991	52.267	36.6352
	liprin		23.9115	22.4536	22.971	34.0486	26.247	29.4205	28.787	35.7864	28.7084	27.9358	25.738		21.9921	20.5528	28.9736	29.1559	40.0206	25.3328	17.6989	28.17		27.2308	25.4717	28.1662	24.1188	32.261	27.9257	28.6924		24.6395	23.6499	31.8263	19.5997	23.2284
	lamin		22.8971	17.9176	6.28729	5.5505	27.3557	4.88526	23.0363	6.40786	28.8469	4.37029	12.1512		17.9257	25.9943	4.15214	14.9165	5.22543	9.39032	22.5002	24.1106		4.9012	31.8931	23.4639	24.1659	2.26777	21.9827	22.1781		28.3585	21.0851	26.648	17.1047	13.5732
	liprin		29.43	25.8951	29.5026	27.4144	30.4611	22.0096	26.3349	28.3052	29.914	21.475	23.346		28.9306	28.1079	25.8184	25.2722	19.227	25.7311	33.6785	23.4071		21.2706	26.7239	17.2261	27.1141	17.3147	18.5659	19.4688		23.5454	22.165	18.2147	25.5843	29.9149
	lamin		12.4803	28.0165	16.5034	5.16471	20.5754	4.04808	20.4897	4.41736	19.2035	6.5008	14.1625		26.4015	20.1648	4.26581	16.5662	5.28844	7.91199	26.3837	22.2045		9.07246	17.7145	23.0904	20.8402	1.97024	19.1413	25.6484		24.1119	21.5637	15.9529	22.1309	20.1028
	liprin		18.7572	25.8336	21.245	19.2728	23.8108	22.8181	27.7096	21.817	20.1401	28.2648	37.0916		28.185	17.396	27.3373	24.2379	20.9907	19.5391	17.0762	21.5777		26.2351	23.8136	24.6816	21.9414	21.8693	33.3573	21.1033		22.4329	27.8242	23.6179	25.6058	23.9468
	lamin		30.1231	20.9956	6.24428	4.24651	17.7225	4.51457	18.0447	2.27794	21.5718	5.48526	8.2106		26.7941	24.9729	4.19954	10.772	3.11729	7.69295	18.8078	23.868		6.53895	18.8348	23.2169	20.9757	2.69427	18.8817	22.8069		18.9669	27.8482	25	8.49738	29.6888
	liprin		27.9013	25.8176	26.2814	19.2643	19.481	25.7519	17.1685	14.0913	21.2376	22.3244	13.8244		20.8923	33.9433	17.8708	21.334	19.7617	29.397	31.5464	26.8452		25.2634	23.9907	29.9261	26.8256	28.555	20.151	30.7356		29.3822	26.361	26.3411	29.2102	22.9098
			100	100	100	100	100	100	100	100	100	100	100		100	100	100	100	100	100	100	100		100	100	100	100	100	100	100
			100	100	100	100	100	100	100	100	100	100	100		100	100	100	100	100	100	100	100		100	100	100	100	100	100	100
			1	2	3	4	5	6	7	8	9	10	11	12	13	14	15	16	17	18	19	20	21	22	23	24	25	26	27	28	29	30	31
	laminin		34.4995	33.0703	70.965	85.0383	34.3464	86.5521	38.4293	86.8968	30.3778	83.6436	65.4758	28.8787	28.868	87.3825	57.7453	86.3688	75.0047	32.3083	29.8168	79.4874	31.5576	30.2289	34.0182	93.0677	39.9943	29.3666	28.5627	29.503	32.3991	52.267	36.6352
			22.8971	17.9176	6.28729	5.5505	27.3557	4.88526	23.0363	6.40786	28.8469	4.37029	12.1512	17.9257	25.9943	4.15214	14.9165	5.22543	9.39032	22.5002	24.1106	4.9012	31.8931	23.4639	24.1659	2.26777	21.9827	22.1781	28.3585	21.0851	26.648	17.1047	13.5732
			12.4803	28.0165	16.5034	5.16471	20.5754	4.04808	20.4897	4.41736	19.2035	6.5008	14.1625	26.4015	20.1648	4.26581	16.5662	5.28844	7.91199	26.3837	22.2045	9.07246	17.7145	23.0904	20.8402	1.97024	19.1413	25.6484	24.1119	21.5637	15.9529	22.1309	20.1028
			30.1231	20.9956	6.24428	4.24651	17.7225	4.51457	18.0447	2.27794	21.5718	5.48526	8.2106	26.7941	24.9729	4.19954	10.772	3.11729	7.69295	18.8078	23.868	6.53895	18.8348	23.2169	20.9757	2.69427	18.8817	22.8069	18.9669	27.8482	25	8.49738	29.6888
	liprin		23.9115	22.4536	22.971	34.0486	26.247	29.4205	28.787	35.7864	28.7084	27.9358	25.738	21.9921	20.5528	28.9736	29.1559	40.0206	25.3328	17.6989	28.17	27.2308	25.4717	28.1662	24.1188	32.261	27.9257	28.6924	24.6395	23.6499	31.8263	19.5997	23.2284
			29.43	25.8951	29.5026	27.4144	30.4611	22.0096	26.3349	28.3052	29.914	21.475	23.346	28.9306	28.1079	25.8184	25.2722	19.227	25.7311	33.6785	23.4071	21.2706	26.7239	17.2261	27.1141	17.3147	18.5659	19.4688	23.5454	22.165	18.2147	25.5843	29.9149
			18.7572	25.8336	21.245	19.2728	23.8108	22.8181	27.7096	21.817	20.1401	28.2648	37.0916	28.185	17.396	27.3373	24.2379	20.9907	19.5391	17.0762	21.5777	26.2351	23.8136	24.6816	21.9414	21.8693	33.3573	21.1033	22.4329	27.8242	23.6179	25.6058	23.9468
			27.9013	25.8176	26.2814	19.2643	19.481	25.7519	17.1685	14.0913	21.2376	22.3244	13.8244	20.8923	33.9433	17.8708	21.334	19.7617	29.397	31.5464	26.8452	25.2634	23.9907	29.9261	26.8256	28.555	20.151	30.7356	29.3822	26.361	26.3411	29.2102	22.9098

## Sheet: Slices
	cross analysis - 4 ROIs across the cell with region 1 as the capillary interface
			29-9-18-islet 3			4-10-18-slice4											4-10-18 sliceislet1										1-11-18 islet 1
Region			1	2		3	4	5	6	7	8	9	10	11	12		13	14	15	16	17	18	19	20	21		22	23	24	25	26	27	28	29
1	lamin		169.775	738.365		777.124	446.423	560.47	825.191	1067.43	612.93	1496.6	527.104	1045.11	1305.84		393.237	439.418	421.994	375.644	730.502	557.403	529.304	767.568	370.883		896.326	438.36	500.99	1013.97	639.216	431.278	862.361	1005.26
	liprin		735.154	1364.65		1288.84	1326.31	1435.74	1964.64	2050.75	1014.22	2458.23	1753.95	1836.13	2251.71		886.545	757.302	939.988	1156.02	889.751	858.835	1169.65	1553.77	1567.78		981.523	1108.89	815.33	1020.19	1106.35	1199.77	1117.33	2042.29
2	lamin		93.115	171.975		33.464	39.6	51.061	44.539	76.983	66.948	67.061	39.904	34.217	48.104		57.208	35.508	29.564	31.911	148.907	35.58	35.177	38.352	62.416		31.826	8.547	9.237	9.515	28.577	16.134	12.763	159.412
	liprin		455.603	891.427		591.711	571.261	855.443	1050.02	1269.1	1180.22	1098.75	1012.03	746.687	800.539		496.313	471.08	527.584	602.339	918.576	705.416	759.844	961.842	961.755		364.512	375.035	349.093	513.948	547.021	983.227	709.876	638.907
3	lamin		115.759	157.922		211.515	310.365	40.843	39.661	215.522	67.383	126.791	50.73	43.722	59.696		78.016	35.749	26.525	39.609	36.492	62.794	44.344	54.512	65.154		14.698	27.349	10.66	9.887	6.918	25.67	33.711	46.649
	liprin		717.365	821.693		628.258	755.609	689.974	913.287	1029.17	998.548	1850.41	992.617	1124.76	1355.1		561.852	713.259	422.442	680.228	514.677	700.735	802.152	1144.58	847.636		507.488	603.884	479.598	565.206	725.907	1091.45	754.969	730.526
4	lamin		159.284	145.115		50.773	59.348	56.835	56	68.374	95.991	69.73	61.678	59.226	47.809		405.78	56.621	33.385	30.453	30.177	30.519	29.173	53.208	68.601		18.826	19.99	4.938	11.979	12.505	8.918	46.546	32.021
	liprin		712.014	630.358		830.722	690.287	570.757	980.043	860.026	1099.88	1467.62	1201.66	1229.78	1356.71		776.105	525.093	562.405	673.802	720.385	656.479	747.85	780.551	767.706		402.616	453.351	465.845	513.495	603.155	1088.02	685.845	827.495
																																				average
			31.5606	60.8521		72.4337	52.1683	79.0275	85.4774	74.7339	72.6865	85.0253	77.5819	88.3982	89.3524		42.0916	77.4583	82.5064	78.6496	77.2137	81.219	82.9633	84.0121	65.4052		93.2046	88.6927	95.2769	96.998	93.0153	89.4768	90.2636	80.8514		78.2275
			28.0579	36.8016		38.5934	39.6687	40.4216	40.0295	39.3689	23.6257	35.756	35.3601	37.1885	39.0646		32.5838	30.7006	38.329	37.1425	29.2355	29.3974	33.6154	34.9889	37.8246		43.5045	43.6373	38.6437	39.0452	37.0956	27.5021	34.1898	48.1761		36.1913
			17.3098	14.1733		3.11909	4.6276	7.19971	4.61357	5.38978	7.93926	3.80989	5.87328	2.89416	3.29152		6.12347	6.25917	5.78022	6.68129	15.7394	5.18435	5.51365	4.19771	11.0071		3.30943	1.7293	1.75667	0.910221	4.15837	3.3473	1.33591	12.8213		6.07227
			17.3885	24.0398		17.7184	17.0859	24.084	21.394	24.3634	27.4926	15.9818	20.4027	15.1232	13.8884		18.2413	19.0973	21.5128	19.3529	30.1827	24.146	21.8378	21.6595	23.2034		16.1565	14.7584	16.5457	19.6701	18.3414	22.5383	21.7219	15.0713		20.1035
			21.5192	13.0151		19.7148	36.2688	5.75895	4.10828	15.0893	7.99085	7.20329	7.46671	3.69811	4.0847		8.35074	6.30165	5.18605	8.29305	3.85719	9.1497	6.95049	5.96646	11.4899		1.52837	5.53348	2.02729	0.945808	1.00667	5.32573	3.52854	3.75191		8.10728
			27.3789	22.1592		18.8128	22.5996	19.4254	18.6082	19.7574	23.2607	26.915	20.0114	22.7805	23.5095		20.6501	28.9151	17.2255	21.8555	16.9113	23.9857	23.0537	25.7745	20.4502		22.4936	23.7641	22.7312	21.6319	24.3394	25.0191	23.1017	17.2326		22.2191
			29.6104	11.9596		4.73242	6.93532	8.01386	5.80076	4.78704	11.3834	3.96152	9.07809	5.00948	3.27134		43.4342	9.98086	6.52729	6.37603	3.18969	4.44692	4.57258	5.82374	12.0978		1.95762	4.04454	0.939096	1.14593	1.81966	1.85021	4.87198	2.5754		7.59299
			27.1747	16.9994		24.8754	20.6459	16.069	19.9683	16.5102	25.6211	21.3472	24.2258	24.9077	23.5374		28.5247	21.287	22.9327	21.649	23.6705	22.4709	21.4931	17.577	18.5218		17.8454	17.8403	22.0794	19.6528	20.2236	24.9405	20.9866	19.52		21.4861
			100	100		100	100	100	100	100	100	100	100	100	100		100	100	100	100	100	100	100	100	100		100	100	100	100	100	100	100	100
			100	100		100	100	100	100	100	100	100	100	100	100		100	100	100	100	100	100	100	100	100		100	100	100	100	100	100	100	100
		region
	laminin	1	31.5606	60.8521		72.4337	52.1683	79.0275	85.4774	74.7339	72.6865	85.0253	77.5819	88.3982	89.3524		42.0916	77.4583	82.5064	78.6496	77.2137	81.219	82.9633	84.0121	65.4052		93.2046	88.6927	95.2769	96.998	93.0153	89.4768	90.2636	80.8514
		2	17.3098	14.1733		3.11909	4.6276	7.19971	4.61357	5.38978	7.93926	3.80989	5.87328	2.89416	3.29152		6.12347	6.25917	5.78022	6.68129	15.7394	5.18435	5.51365	4.19771	11.0071		3.30943	1.7293	1.75667	0.910221	4.15837	3.3473	1.33591	12.8213
		3	21.5192	13.0151		19.7148	36.2688	5.75895	4.10828	15.0893	7.99085	7.20329	7.46671	3.69811	4.0847		8.35074	6.30165	5.18605	8.29305	3.85719	9.1497	6.95049	5.96646	11.4899		1.52837	5.53348	2.02729	0.945808	1.00667	5.32573	3.52854	3.75191
		4	29.6104	11.9596		4.73242	6.93532	8.01386	5.80076	4.78704	11.3834	3.96152	9.07809	5.00948	3.27134		43.4342	9.98086	6.52729	6.37603	3.18969	4.44692	4.57258	5.82374	12.0978		1.95762	4.04454	0.939096	1.14593	1.81966	1.85021	4.87198	2.5754
	liprin	1	28.0579	36.8016		38.5934	39.6687	40.4216	40.0295	39.3689	23.6257	35.756	35.3601	37.1885	39.0646		32.5838	30.7006	38.329	37.1425	29.2355	29.3974	33.6154	34.9889	37.8246		43.5045	43.6373	38.6437	39.0452	37.0956	27.5021	34.1898	48.1761
		2	17.3885	24.0398		17.7184	17.0859	24.084	21.394	24.3634	27.4926	15.9818	20.4027	15.1232	13.8884		18.2413	19.0973	21.5128	19.3529	30.1827	24.146	21.8378	21.6595	23.2034		16.1565	14.7584	16.5457	19.6701	18.3414	22.5383	21.7219	15.0713
		3	27.3789	22.1592		18.8128	22.5996	19.4254	18.6082	19.7574	23.2607	26.915	20.0114	22.7805	23.5095		20.6501	28.9151	17.2255	21.8555	16.9113	23.9857	23.0537	25.7745	20.4502		22.4936	23.7641	22.7312	21.6319	24.3394	25.0191	23.1017	17.2326
		4	27.1747	16.9994		24.8754	20.6459	16.069	19.9683	16.5102	25.6211	21.3472	24.2258	24.9077	23.5374		28.5247	21.287	22.9327	21.649	23.6705	22.4709	21.4931	17.577	18.5218		17.8454	17.8403	22.0794	19.6528	20.2236	24.9405	20.9866	19.52
