# Supplementary material for: Local activation of focal adhesion kinase orchestrates the positioning of presynaptic scaffold proteins and Ca2+ signalling to control glucose-dependent insulin secretion
Source: eLife. 2022 May 13;11:e76262. doi: 10.7554/eLife.76262 (PMC9126582; doi:10.7554/eLife.76262)
Supplement: Figure 3—figure supplement 1—source data 1. [file elife-76262-fig3-figsupp1-data1.xlsx]

## Sheet: All data combined
		2.8						8 mM G
	Islets (DMSO)	0.035178	0.031232	0.040153	0.0445	0.020008	0.017477	0.209066	0.190311	0.144134	0.173391	0.231138	0.220579
	Islets (glibenclamide)	0.135265	0.144984	0.132337	0.128407	0.08094	0.079572	0.434273	0.44557	0.282279	0.254844	0.211491	0.201198
	Slices (DMSO)	0.145408	0.210194	0.17907	0.198837	0.165331	0.166925	0.553734	0.579116	0.334868	0.372727	0.426846	0.493595
	Slices (glibenclamide)	0.370796	0.367748	0.457965	0.385236	0.42844	0.377102	0.416093	0.374214	0.443222	0.399824	0.470653	0.414631
		2.8	2.8	2.8	2.8	2.8	2.8	8	8	8	8	8	8
	Islets (DMSO)	0.035178	0.031232	0.040153	0.0445	0.020008	0.017477	0.209066	0.190311	0.144134	0.173391	0.231138	0.220579
	Islets (glibenclamide)	0.135265	0.144984	0.132337	0.128407	0.08094	0.079572	0.434273	0.44557	0.282279	0.254844	0.211491	0.201198
	Slices (DMSO)	0.145408	0.210194	0.17907	0.198837	0.165331	0.166925	0.553734	0.579116	0.334868	0.372727	0.426846	0.493595
	Slices (glibenclamide)	0.370796	0.367748	0.457965	0.385236	0.42844	0.377102	0.416093	0.374214	0.443222	0.399824	0.470653	0.414631

## Sheet: 11-2-22
<>	23	24
A	34425	44043		8	1.02106	9.67185
B	38305	41274		4	0.644772	5.73899
C	38699	40035		2	0.390217	3.07844
D	39170	39578		1	0.301047	2.14646
E	39589	35085		0.5	0.183991	0.923021
F	39436	36165		0.25	0.129298	0.35139
G	40380	31207		0.125	0.111268	0.162944
H	42988	32368		0	0.0956779	0
I	43465	36058							volume	dilution	ng insulin	%lysate							ng insulin	%lysate
J	41908	35003		Slice	b	0.171655	0.794097	0.391154	1	2	0.782307	0.145408					Slice	basal 2.8mM G	0.782307	0.145408
K	41319	32218			b	0.187291	0.957519	0.523656	1	2	1.04731	0.210194						basal 2.8mM G	1.04731	0.210194
L	41743	32645			s	0.160652	0.679098	0.297912	1	10	2.97912	0.553734						Stim 8mM G	2.97912	0.553734
M	42323	35660			s	0.159548	0.667551	0.28855	1	10	2.8855	0.579116						Stim 8mM G	2.8855	0.579116
N	42723	36260			l	0.172861	0.806699	0.401371	1	1000	401.371							lysate	401.371
O	43244	39703			l	0.177305	0.853145	0.43903	1	1000	439.03							lysate	439.03
P	42250	38858			b+g	0.243201	1.54188	0.997454	1	2	1.99491	0.370796						basal with glib	1.99491	0.370796
					b+g	0.233609	1.44163	0.91617	1	2	1.83234	0.367748						basal with glib	1.83234	0.367748
<>	23	24			s+g	0.140363	0.467036	0.125972	1	10	1.25972	0.234147		out of range, rerun				Stim with glib	2.23861	0.416093
A	35150	6182			s+g	0.134928	0.410228	0.0799125	1	10	0.799125	0.160383						Stim with glib	1.86456	0.374214
B	24698	5569			l+g	0.188985	0.975218	0.538007	1	1000	538.007							lysate with glib	538.007
C	15101	7566			l+g	0.184294	0.926196	0.49826	1	1000	498.26							lysate with glib	498.26
D	11792	7294		islet	b	0.26946	1.81632	1.21998	0.5	1	0.609988	0.0351779					islet	basal 2.8mM G	0.609988	0.0351779
E	7284	9454			b	0.263404	1.75303	1.16866	0.5	1	0.584328	0.0312323						basal 2.8mM G	0.584328	0.0312323
F	5099	9526			s	1.36607	13.2778	10.513	0.5	2	10.513	0.606281						Stim 8mM G	3.62523	0.209066
G	4493	42631			s	1.34077	13.0134	10.2985	0.5	2	10.2985	0.550456						Stim 8mM G	3.56056	0.190311
H	4113	43398			l	0.943979	8.86622	6.93603	0.5	500	1734.01							lysate	1734.01
I	7461	34038			l	1.0086	9.54162	7.48364	0.5	500	1870.91							lysate	1870.91
J	7849	35304			b+g	1.27385	12.314	9.73147	0.5	1	4.86574	0.308339						basal with glib	2.13455	0.135265
K	6638	41041			b+g	1.32501	12.8487	10.165	0.5	1	5.0825	0.325137						basal with glib	2.26637	0.144984
L	6660	43255			s+g	0.934184	8.76385	6.85303	0.5	2	6.85303	0.434273						Stim with glib	6.85303	0.434273
M	7316	33313			s+g	0.947408	8.90206	6.96509	0.5	2	6.96509	0.44557						Stim with glib	6.96509	0.44557
N	7575	34353			l+g	0.870362	8.0968	6.31219	0.5	500	1578.05							lysate with glib	1578.05
O	10517	34556			l+g	0.863349	8.02349	6.25275	0.5	500	1563.19							lysate with glib	1563.19
P	9870	33548

## Sheet: 11-2-22 (rerun)
HTRF rerun for out or range wells	4
A	30446		8	1.66078	11.5879
B	32156		4	0.979475	6.42396
C	37793		2	0.588919	3.46372
D	38995		1	0.321862	1.43956
E	39610		0.5	0.244509	0.853262
F	40197		0.25	0.180884	0.371016
G	42119		0.125	0.156865	0.188963
H	41983		0	0.131934	0
I	42770					ng/mL	volume	dilution	ng insulin
J	43159		slice s+g	0.234206	0.775172	0.447722	1	5	2.23861
K	36511			0.219653	0.664865	0.372912	1	5	1.86456
L	37033		islet s	0.852346	5.46038	3.62523	0.5	2	3.62523
M	40085			0.839765	5.36502	3.56056	0.5	2	3.56056
N	38597		islet b+g	0.562355	3.26238	2.13455	0.5	2	2.13455
O	678			0.587999	3.45675	2.26637	0.5	2	2.26637
P	661
<>	4
A	50564
B	31496
C	22257
D	12551
E	9685
F	7271
G	6607
H	5539
I	10017
J	9480
K	31120
L	31099
M	22542
N	22695
O	1640
P	1349

## Sheet: 18-02-22
<>	5	6
A	33998	42990		8	1.27093	9.84188
B	37819	42046		4	0.69629	4.93983
C	39205	40928		2	0.502053	3.28286
D	40179	40132		1	0.306678	1.61617
E	40310	40438		0.5	0.229472	0.957549
F	40653	40940		0.25	0.162104	0.382854
G	42295	41552		0.125	0.147464	0.25797
H	43933	40396		0	0.117224	0
I	42801	39762
J	43619	39675
K	43520	42883
L	42934	42402						ng/mL	volume	dilution	ng insulin	%lysate
M	42513	43253		slice	b	0.238406	1.03376	0.648339	1	2	1.29668	0.17907
N	44124	44102			b	0.238061	1.03083	0.645926	1	2	1.29185	0.198837
O	43606	39506			s	0.215097	0.834919	0.48497	1	5	2.42485	0.334868
P	42762	39251			s	0.215004	0.834134	0.484324	1	5	2.42162	0.372727
					l	0.249218	1.126	0.72412	1	1000	724.12
<>	5	6			l	0.2386	1.03542	0.649703	1	1000	649.703
A	43209	10122			b+g	0.377219	2.21793	1.62125	1	2	3.24251	0.457965
B	26333	9901			b+g	0.361676	2.08534	1.51232	1	2	3.02464	0.385236
C	19683	10106			s+g	0.23545	1.00855	0.627624	1	5	3.13812	0.443222
D	12322	10351			s+g	0.23548	1.00881	0.627835	1	5	3.13918	0.399824
E	9250	7954			l+g	0.246921	1.10641	0.708024	1	1000	708.024
F	6590	8363			l+g	0.257924	1.20027	0.785138	1	1000	785.138
G	6237	9093		islets	b	0.196696	0.677952	0.356005	0.5	2	0.356005	0.0401532
H	5150	9569			b	0.204275	0.742601	0.409121	0.5	2	0.409121	0.0444999
I	10204	25921			s	0.218834	0.866805	0.511167	0.5	5	1.27792	0.144134
J	10384	26606			s	0.23688	1.02075	0.637645	0.5	5	1.59411	0.173391
K	9361	12267			l	0.651904	4.56118	3.54647	0.5	500	886.617
L	9231	12245			l	0.670599	4.72066	3.6775	0.5	500	919.374
M	10595	11483			b+g	0.286057	1.44026	0.982321	0.5	2	0.982321	0.132337
N	10528	11437			b+g	0.288784	1.46352	1.00143	0.5	2	1.00143	0.128407
O	16449	22500			s+g	0.265484	1.26476	0.838129	0.5	5	2.09532	0.282279
P	15466	23197			s+g	0.259331	1.21227	0.794998	0.5	5	1.9875	0.254844
					l+g	0.569534	3.85851	2.96915	0.5	500	742.288
					l+g	0.590991	4.04156	3.11954	0.5	500	779.886

## Sheet: 25-02-22
<>	5	6
A	31047	41228		8	1.53529	11.7689
B	36868	40133		4	0.693338	4.76648
C	37892	38816		2	0.499842	3.15717
D	39300	38531		1	0.316209	1.6299
E	39290	39508		0.5	0.203589	0.693243
F	39680	39566		0.25	0.188508	0.567818
G	41050	38652		0.125	0.1457	0.211787
H	40853	39757		0	0.120236	0
I	41189	35209
J	41596	34973
K	41449	41564
L	40889	41048						ng/mL	volume	dilution	ng insulin	%lysate
M	40317	42243		slice	b	0.245454	1.04143	0.724959	1	2	1.44992	0.165331
N	42162	42203			b	0.239687	0.993468	0.69155	1	2	1.3831	0.166925
O	42155	36765			s	0.184926	0.538026	0.374335	1	10	3.74335	0.426846
P	42715	36140			s	0.190907	0.58777	0.408982	1	10	4.08982	0.493595
					l	0.271697	1.2597	0.876979	1	1000	876.979
<>	5	6			l	0.263341	1.1902	0.828578	1	1000	828.578
A	47666	7709			b+g	0.241703	1.01024	0.703233	1	5	3.51616	0.42844
B	25562	7335			b+g	0.233923	0.945529	0.658161	1	5	3.2908	0.377102
C	18940	10169			s+g	0.186985	0.555147	0.38626	1	10	3.8626	0.470653
D	12427	10440			s+g	0.182767	0.520072	0.36183	1	10	3.6183	0.414631
E	7999	6564			l+g	0.26198	1.17888	0.820689	1	1000	820.689
F	7480	6313			l+g	0.270951	1.25349	0.872656	1	1000	872.656
G	5981	12837		islets	b	0.166144	0.381813	0.265532	0.5	2	0.265532	0.0200083
H	4912	12661			b	0.159556	0.327025	0.227373	0.5	2	0.227373	0.0174772
I	10110	36501			s	0.332117	1.76221	1.22698	0.5	5	3.06745	0.231138
J	9970	35625			s	0.31846	1.64862	1.14787	0.5	5	2.86966	0.220579
K	7665	7820			l	1.0367	7.62217	5.30844	0.5	500	1327.11
L	7806	7530			l	1.01864	7.47203	5.20387	0.5	500	1300.97
M	10954	8826			b+g	0.188144	0.564786	0.392974	0.5	5	0.982434	0.08094
N	11103	8446			b+g	0.183444	0.525698	0.365749	0.5	5	0.914372	0.0795725
O	10189	35237			s+g	0.208934	0.7377	0.513408	0.5	10	2.56704	0.211491
P	9992	33024			s+g	0.200128	0.66446	0.462396	0.5	10	2.31198	0.201198
					l+g	0.958439	6.97131	4.85512	0.5	500	1213.78
					l+g	0.91378	6.59989	4.59642	0.5	500	1149.11
