# Supplementary material for: Local activation of focal adhesion kinase orchestrates the positioning of presynaptic scaffold proteins and Ca2+ signalling to control glucose-dependent insulin secretion
Source: eLife. 2022 May 13;11:e76262. doi: 10.7554/eLife.76262 (PMC9126582; doi:10.7554/eLife.76262)
Supplement: Figure 5—source data 1. [file elife-76262-fig5-data1.xlsx]

## Sheet: Sheet1
ISLETS
		cell 1	cell 2	cell 3	cell 4	cell 5	cell 6	cell 1	cell 2	cell 3	cell 5	cell 6	cell 7	cell 8	cell 1	cell 2	cell 3	cell 4	cell 1	cell 2	cell 3	cell 4	cell 5	cell 6	cell 7	cell 8	cell 9	cell 1	cell 2	cell 3	cell 4	cell 5	cell 6	cell 7	cell 8	cell 1	cell 2	cell 3	cell 4	cell 5	cell 6	cell 7	cell 8
		GFP	GFP	GFP	GFP	GFP	GFP	GFP	GFP	GFP	GFP	GFP	GFP	GFP	GFP	GFP	GFP	GFP	GFP	GFP	GFP	GFP	GFP	GFP	GFP	GFP	GFP	GFP	GFP	GFP	GFP	GFP	GFP	GFP	GFP	GFP	GFP	GFP	GFP	GFP	GFP	GFP	GFP
	min	694.178	420.996	431.827	373.507	451.867	505.24	264.351	340.575	445.775	404.502	339.709	299.664	232.958	412.553	354.479	339.784	312.914	174.13	348.674	297.229	193.247	162.3	293.628	200.77	215.41	147.254	262.44	266.034	296.171	248.255	251.585	297.656	276.063	318.709	482.217	382.994	314.848	611.753	320.878	378.693	365.395	298.57
	max	6849.74	2106.32	4028.69	2981.35	2183.5	1336.54	1543.54	2491.18	6499.43	1090.03	2010.91	1305.2	862.211	4185.59	3180.92	3718.23	3455.73	715.243	1173.89	1000.25	957.793	792.694	860.504	774.622	817.423	516.661	1427.74	1267.36	1075.42	1125.97	1389.09	1480.39	816.398	1807.33	1192.05	1214.72	1290.77	900.768	960.076	1164.42	1150.12	963.562
SLICES		cell 1	cell 2	cell 3	cell 4	cell 5	cell 6	cell 1	cell 2	cell 1	cell 2	cell 3	cell 4	cell 1	cell 2	cell 3	cell 4	cell 5	cell 6	cell 7	cell 1	cell 2	cell 3	cell 1	cell 2	cell 3	cell 4	cell 1	cell 2	cell 3																cell 6	cell 7	cell 1	cell 2
		GFP	GFP	GFP	GFP	GFP	GFP	GFP	GFP	GFP	GFP	GFP	GFP	GFP	GFP	GFP	GFP	GFP	GFP	GFP	GFP	GFP	GFP	GFP	GFP	GFP	GFP	GFP	GFP	GFP																GFP	GFP	GFP	GFP
	min	1806.62	557.508	280.275	446.277	326.036	353.649	270.525	292.092	235.496	217.17	248.855	249.27	446.873	324.603	495.807	305.661	351.838	381.377	324.686	466.469	480.845	468.132	1138.22	1163.42	1666.99	1598.11	1133.66	1172.19	760.501																381.377	324.686	466.469	480.845
	max	4156.47	2398.39	726.485	1977.18	1277.08	946.52	672.687	934.555	589.292	487.831	485.255	421.25	1631.31	1212.11	1192.51	816.63	695.376	1087.97	757.976	1019.82	1002.22	820.821	3779.23	2953.5	7054.14	6450.56	1671.04	2580.86	1009.23																1087.97	757.976	1019.82	1002.22
		MAX					MIN
		ttest	0.844897			ttest	0.000334532
		mean islets	1825.34			mean islets	334.043
		count	42			count
		SEM	223.141			SEM	17.2726
		mean slices	1752.01			mean slices	619.42
		count	29			count
		SEM	312.56			SEM	87.7235
[truncated: 8 more columns]
