# Supplementary material for: Local activation of focal adhesion kinase orchestrates the positioning of presynaptic scaffold proteins and Ca2+ signalling to control glucose-dependent insulin secretion
Source: eLife. 2022 May 13;11:e76262. doi: 10.7554/eLife.76262 (PMC9126582; doi:10.7554/eLife.76262)
Supplement: Figure 5—source data 2. [file elife-76262-fig5-data2.xlsx]

## Sheet: Nicoles Prizm
	FROM NICOLES PRIZM
									time to peak
									slices							islets
							8 mM glucose		38	10	90.6667					209.333	138	149.333	87			0.0383169
							16 mM glucose		34.6667	32.6667	90	23.1667				182	194.333	94	128.667			0.0282751
								MEAN	45.5952							147.833
								SEM	12.0688							17.0095
								TTEST	0.000243081

## Sheet: using nicoles latency to peak
		measure 3XSD for SRB and the time to peak for the calcium
	all 2.8 to 16.7 mM glucose
			averages from each slice
	Slices
		slice 7 20-11	23.16
		slice 2 20-11	85.66
		slice 4 3-11	90
		slice 3 3-11	32.66	mean	57.87
	nb 4 slices and 18 cells			SEM	17.4283	ttest	0.00357037
	islets	islet 7 15-10	182
		islet 9 15-10	194
		islet 10 15-10	94
		islet 5 17-11	128
		islet 2 6-11	153
		islet 6 17-11	178.6	mean	154.933
				SEM	15.5573
	nb from 6 islets, 43 cells
