# Supplementary material for: Local activation of focal adhesion kinase orchestrates the positioning of presynaptic scaffold proteins and Ca2+ signalling to control glucose-dependent insulin secretion
Source: eLife. 2022 May 13;11:e76262. doi: 10.7554/eLife.76262 (PMC9126582; doi:10.7554/eLife.76262)
Supplement: Figure 5—source data 3. [file elife-76262-fig5-data3.xlsx]

## Sheet: Sheet1
	islets
islet 7	6fps	339.323		116.479		269.587		256.35		312.732		92.0878
	f change per second	2035.94		698.871		1617.52		1538.1		1876.39		552.527												2035.94	698.871	1617.52	1538.1	1876.39	552.527
islet 9	6fps	103.103		110.995		282.932		125.561		183.914		107.054		74.1775										618.615	665.969	1697.59	753.368	1103.49	642.322	445.065
	f change per second	618.615		665.969		1697.59		753.368		1103.49		642.322		445.065										2116.1	1978.67	1509.2	1368.66
islet 10	6fps	352.683		329.779		251.533		228.11																394.643	641.73	400.994	447.203	471.544	695.085	378.256	546.852	337.057
	f change per second	2116.1		1978.67		1509.2		1368.66																714.732	558.154	517.63	543.499	738.39	500.585	354.234	835.308
islet 2	3fps	131.548		213.91		133.665		149.068		157.181		231.695		126.085		182.284		112.352						491.242	473.217	750.414	471.177	521.658	447.752	352.338	398.854
	f change per second	394.643		641.73		400.994		447.203		471.544		695.085		378.256		546.852		337.057
islet 5	3fps	238.244		186.051		172.543		181.166		246.13		166.862		118.078		278.436
	f change per second	714.732		558.154		517.63		543.499		738.39		500.585		354.234		835.308					mean	814.308
islets 6	3fps	163.747		157.739		250.138		157.059		173.886		149.251		117.446		132.951					sem	81.5073
	f change per second	491.242		473.217		750.414		471.177		521.658		447.752		352.338		398.854																					islet data
																																						2035.94	698.871	1617.52	1538.1	1876.39	552.527	618.615	665.969	1697.59	753.368	1103.49	642.322
slices
	3fps	405.186		319.542		83.0278		199.719		114.386		166.636
	f change per second	1215.56		958.627		249.084		599.157		343.157		499.909												1215.56	958.627	249.084	599.157	343.157	499.909
	3fps	85.8703		106.861																				257.611	320.582										0.417345
	f change per second	257.611		320.582																				223.695	115.563	133.091	151.851
	3fps	74.5649		38.521		44.3638		50.6171																332.865	331.715	271.18	167.599	181.334	201.029	187.769
	f change per second	223.695		115.563		133.091		151.851																1640.24	984.757	1718.79	2146.09
	3fps	110.955		110.572		90.3933		55.8663		60.4447		67.0096		62.5896										736.02	800.495	735.501
	f change per second	332.865		331.715		271.18		167.599		181.334		201.029		187.769
	6fps	273.373		164.126		286.464		357.682
	f change per second	1640.24		984.757		1718.79		2146.09
		122.67		133.416		122.584															mean	596.28
	f change per second	736.02		800.495		735.501															SEM	108.051
																					ttest	0.108464					Dillon Isolated Islet Data which exhibit waves:
																											islet 1				islet 2	islet 3
																											424.116	518.37	586.53	789.15	2034.01	1902.85	729.36
																															Breakdown
																										Basal:	1138.44				4252.26	1121.58
																										apical:	688.068				1270.56	850.53
																											Dillon Slice Data which exhibit waves:
																											slice 1	slice2	slice 3
																											4583.1	1017.18	469.398
																										Basal:	7711.08	1581.26	1053.5
																										apical:	2601.36	807.03	785.37
																																		MEANS	3098.73	1987.67	620.894
																																		SEM	374.436	293.473	101.683
																																			basal	apical	general - mixed data in progress
																																		slice 4 gcamp basal	2393.16	1173.13	1215.56
																																			1522.27	1754.96	958.627
																																			2023.15	1149.37	249.084	basal vs apical slices				basal vs general slices					apical vs general slices
																																			2461.64	1048.69	599.157	t-Test: Paired Two Sample for Means				t-Test: Two-Sample Assuming Equal Variances					t-Test: Two-Sample Assuming Equal Variances
																																			3386.4	1322.47	343.157
																																			2480.24	1310.38	499.909		Variable 1	Variable 2			Variable 1	Variable 2				Variable 1	Variable 2
																																			1689.14	966.594	257.611	Mean	3098.73	1987.67		Mean	3098.73	596.28			Mean	1987.67	596.28
																																			3032.21	1221.37	320.582	Variance	3.50506e+06	2.15316e+06		Variance	3.50506e+06	303553			Variance	2.15316e+06	303553
																																			2612.3	1464.82	223.695	Observations	25	25		Observations	25	26			Observations	25	26
																																		islet 1 gcamp	5015.16	2698.26	115.563	Pearson Correlation	0.797394			Pooled Variance	1.87164e+06				Pooled Variance	1.20948e+06
																																			4506.42	2087.76	133.091	Hypothesized Mean Difference	0			Hypothesized Mean Difference	0				Hypothesized Mean Difference	0
																																			2873.58	2389.32	151.851	df	24			df	49				df	49
																																			3193.14	2677.5	332.865	t Stat	4.91589			t Stat	6.53018				t Stat	4.51668
																																		islet 2 gcamp	6410.64	5055.66	331.715	P(T<=t) one-tail	2.57257e-05			P(T<=t) one-tail	1.77317e-08				P(T<=t) one-tail	1.98314e-05
																																			5569.02	6130.14	271.18	t Critical one-tail	1.71088			t Critical one-tail	1.67655				t Critical one-tail	1.67655
																																			4351.86	3968.82	167.599	P(T<=t) two-tail	5.14513e-05			P(T<=t) two-tail	3.54634e-08				P(T<=t) two-tail	3.96629e-05
																																			6345.36	4426.14	181.334	t Critical two-tail	2.0639			t Critical two-tail	2.00958				t Critical two-tail	2.00958
																																		slice 3 basal	1779.23	1009.34	1466.39
																																			764.496	907.362	899.844
																																			1552.67	1040.92	893.106
																																			1711.95	1108.8	1116.14
																																			1448.3	586.074	1111.68
																																		slice 1	7711.08	2601.36	2146.09
																																		slice2	1581.26	807.03	736.02
																																		slice 3	1053.5	785.37	800.495
																																					735.501
																																		islet 1	1138.44	688.068		basal vs apical isolated islets					note: Dillon has used a 1 tail analysis here - should be 2 tail - but still is insignificant
																																		islet 2	4252.26	1270.56		t-Test: Paired Two Sample for Means
																																		islet 3	1121.58	850.53
																																	MEAN		2170.76	936.386			Variable 1	Variable 2
																																	SEM		1040.76	173.544		Mean	2170.76	936.386
																																						Variance	3.24955e+06	90352.7
																															ttest	basal islet vs slice			0.423319	0.234049		Observations	3	3
																																						Pearson Correlation	0.961518
																																						Hypothesized Mean Difference	0
																																						df	2
																																						t Stat	1.4104
																																						P(T<=t) one-tail	0.146924
																																						t Critical one-tail	2.91999
																																						P(T<=t) two-tail	0.293849
																																						t Critical two-tail	4.30265
[truncated: 30 more columns]
