# Supplementary material for: Local activation of focal adhesion kinase orchestrates the positioning of presynaptic scaffold proteins and Ca2+ signalling to control glucose-dependent insulin secretion
Source: eLife. 2022 May 13;11:e76262. doi: 10.7554/eLife.76262 (PMC9126582; doi:10.7554/eLife.76262)
Supplement: Figure 7—source data 1. [file elife-76262-fig7-data1.xlsx]

## Sheet: Sheet1
	control fura 16.7 gluc	Y15
	0.53	0.3
	0.48	0.31
	0.68	0.38
	0.63	0.41
	0.73	0.26
	0.56	0.25
	0.45	0.12
	0.51	0.09
mean	0.57125	0.265
SEM	0.0375493	0.042714
ttest	4.96572e-05
