# Supplementary material for: Local activation of focal adhesion kinase orchestrates the positioning of presynaptic scaffold proteins and Ca2+ signalling to control glucose-dependent insulin secretion
Source: eLife. 2022 May 13;11:e76262. doi: 10.7554/eLife.76262 (PMC9126582; doi:10.7554/eLife.76262)
Supplement: Figure 7—source data 2. [file elife-76262-fig7-data2.xlsx]

## Sheet: Sheet1
				control				Y15
					% Total Release				% Total Release
					2.8->5	2.8->16.7			y15 2.8->5	y15 2.8->16.7			control			Y15				ttest
				Basal %	0.10524	0.0833887		Basal %	0.163404	0.0549831				MEAN	SEM		MEAN			control vs Y15
				Stim %	0.158774	0.409151		Stim %	0.00452347	0.111568			basal	0.0985687	0.0141807	basal	0.127961	0.0240736		0.19398
				K+ %	0.175707	0.389923		K+ %	0.223123	0.283794			5	0.209601	0.0169983	5	0.102142	0.0460186		0.0636027
				Lysate (ng)	675.008	826.177		Lysate (ng)	285.129	875.032			16.7	0.486694	0.0768146	16.7	0.262114	0.0654967		0.0133777
					Fold Change				Fold Change				high K	0.287249	0.0240736	high K	0.278474	0.0496354		0.889427
					2.8->5	2.8->16.7			y15 2.8->5	y15 2.8->16.7
				Stim/Basal	1.50868	4.90655		Stim/Basal	0.0276828	2.02913							basal vs 5mm		control	0.000810915
					1.50868	4.90655			0.0276828	2.02913									y15	0.591577
																	basal vs 16.7		control	3.73199e-05
																			y15	0.0378786
				Control				Y15
													control
					% Total Release				% Total Release				Basal %	0.10524	0.0833887	0.093327	0.168425		mean	0.0985687
					2.8->5	2.8->16.7			y15 2.8->5	y15 2.8->16.7			Basal %	0.0953742	0.139031	0.0578808	0.0458822		SEM	0.0163744
				Basal %	0.0953742	0.139031		Basal %	0.0786928	0.181367
				Stim %	0.22889	0.619409		Stim %	0.0746504	0.403491			y15
				K+ %	0.30459	0.345155		K+ %	0.220064	0.227307			Basal %	0.163404	0.0549831	0.230305	0.155502		mean	0.127961
				Lysate (ng)	504.043	1673.03		Lysate (ng)	1833.67	1446.21			Basal %	0.0786928	0.181367	0.12822	0.0312156		SEM	0.0277978
					Fold Change				Fold Change
					2.8->5	2.8->16.7			y15 2.8->5	y15 2.8->16.7			high K (control)
				Stim/Basal	2.39991	4.45519		Stim/Basal	0.948631	2.22472				0.175707	0.389923	0.163289	0.453149
					2.39991	4.45519			0.948631	2.22472				0.30459	0.345155	0.150982	0.315196
													hig K (Y15)	0.223123	0.283794	0.388606	0.212716
														0.220064	0.227307	0.106146	0.566039
				Control				y15
													control 5 mm			control 16.7
					% Total Release				% Total Release				Stim %	0.158774		0.409151
					2.8->5	2.8->16.7			y15 2.8->5	y15 2.8->16.7			Stim %	0.22889		0.619409
				Basal %	0.093327	0.168425		Basal %	0.230305	0.155502				0.222674		0.610199
				Stim %	0.222674	0.610199		Stim %	0.225117	0.332972				0.228065		0.308015
				K+ %	0.163289	0.453149		K+ %	0.388606	0.212716			y15 5 mm			y15 16.7
				Lysate (ng)	1085.68	1037.76		Lysate (ng)	590.932	1029.38			Stim %	0.00452347		0.111568
					Fold Change				Fold Change				Stim %	0.0746504		0.403491
					2.8->5	2.8->16.7			y15 2.8->5	y15 2.8->16.7				0.225117		0.332972
				Stim/Basal	2.38596	3.62296		Stim/Basal	0.977474	2.14126				0.104277		0.200427
					2.38596	3.62296			0.977474	2.14126
				210904									21O819
					% Total Release			Y15						% Total Release			y15
					2.8->5				2.3->5					2.8->16.7				2.8->16.7
				Basal %	0.0578808				0.12822				Basal %	0.0458822				0.0312156
				Stim %	0.228065				0.104277				Stim %	0.308015				0.200427
				K+ %	0.150982				0.106146				K+ %	0.315196				0.566039
				Lysate (ng)	586.912				967.313				Lysate (ng)	1240.01				1117.78
					Fold Change									Fold Change
					Y15	Control								y15	con
				Stim/Basal	0.813263	3.94026							Stim/Basal	6.42072	6.71317
					0.813263	3.94026								6.42072	6.71317
