# Supplementary material for: Local activation of focal adhesion kinase orchestrates the positioning of presynaptic scaffold proteins and Ca2+ signalling to control glucose-dependent insulin secretion
Source: eLife. 2022 May 13;11:e76262. doi: 10.7554/eLife.76262 (PMC9126582; doi:10.7554/eLife.76262)
Supplement: Figure 7—source data 3. [file elife-76262-fig7-data3.xlsx]

## Sheet: Sheet1
		DMSO			Y15
	2.8 mM G	0.006317	0.025643	0.014982	0.026419	0.039532	0.024036
	16.7 mM G	0.085564	0.253458	0.297636	0.086635	0.168354	0.195502
	40 mM K+	0.127692	0.169479	0.242346	0.111025	0.173709	0.137796
	Table Analyzed	basal 2.8		Table Analyzed	stim 16.7		Table Analyzed	40 mM K+
	Column B	Y15		Column B	Y15		Column B	Y15
	vs.	vs.		vs.	vs.		vs.	vs.
	Column A	DMSO		Column A	DMSO		Column A	DMSO
	Paired t test			Paired t test			Paired t test
	P value	0.0462		P value	0.1915		P value	0.3625
	P value summary	*		P value summary	ns		P value summary	ns
	Significantly different (P < 0.05)?	Yes		Significantly different (P < 0.05)?	No		Significantly different (P < 0.05)?	No
	One- or two-tailed P value?	Two-tailed		One- or two-tailed P value?	Two-tailed		One- or two-tailed P value?	Two-tailed
	t, df	t=4.487, df=2		t, df	t=1.943, df=2		t, df	t=1.170, df=2
	Number of pairs	3		Number of pairs	3		Number of pairs	3
	How big is the difference?			How big is the difference?			How big is the difference?
	Mean of differences (B - A)	0.01435		Mean of differences (B - A)	-0.06206		Mean of differences (B - A)	-0.039
	SD of differences	0.005538		SD of differences	0.05533		SD of differences	0.05773
	SEM of differences	0.003198		SEM of differences	0.03194		SEM of differences	0.03333
	95% confidence interval	0.0005904 to 0.02811		95% confidence interval	-0.1995 to 0.07539		95% confidence interval	-0.1824 to 0.1044
	R squared (partial eta squared)	0.9096		R squared (partial eta squared)	0.6536		R squared (partial eta squared)	0.4064
	How effective was the pairing?			How effective was the pairing?			How effective was the pairing?
	Correlation coefficient (r)	0.8212		Correlation coefficient (r)	0.9991		Correlation coefficient (r)	0.2805
	P value (one tailed)	0.1933		P value (one tailed)	0.0137		P value (one tailed)	0.4095
	P value summary	ns		P value summary	*		P value summary	ns
	Was the pairing significantly effective?	No		Was the pairing significantly effective?	Yes		Was the pairing significantly effective?	No
