# Supplementary material for: Local activation of focal adhesion kinase orchestrates the positioning of presynaptic scaffold proteins and Ca2+ signalling to control glucose-dependent insulin secretion
Source: eLife. 2022 May 13;11:e76262. doi: 10.7554/eLife.76262 (PMC9126582; doi:10.7554/eLife.76262)
Supplement: Figure 8—source data 1. [file elife-76262-fig8-data1.xlsx]

## Sheet: Basal
	Basal 1 DLIE cell1
			Channel1 - ELKS	Area	Mean	Min	Max	Background	Mean (Background subtracted)		Channel 2 - Liprin	Area	Mean	Min	Max	Background	Background Subtracted		Channel 3 - Insulin	Area	Mean	Min	Max	Background	Background subtracted
			Z								Z								Z
	ECM-cell interface	ROI1	5	4.124	406.295	0	1361	91	315.295		5	4.124	523.388	70	1577	190	333.388		5	4.124	1164	515	2844	500	663.999
			6	4.124	571.099	67	1354		480.099		6	4.124	503.559	130	1314		313.559		6	4.124	1349.93	467	4095		849.927
								interface average	397.697							interface average	323.474							interface average	756.963
		ROI2	5	4.124	442.429	2	1240		351.429		5	4.124	476.016	75	1221		286.016		5	4.124	1422.38	618	3786		922.378
			6	4.124	694.693	45	1622		603.693		6	4.124	522.255	136	1291		332.255		6	4.124	2219.49	701	4095		1719.49
								interface average	477.561							interface average	309.135							interface average	1320.93
		ROI3	5	4.124	385.115	4	1273		294.115		5	4.124	536.112	124	1357		346.112		5	4.124	1199.05	537	3845		699.045
			6	4.124	450.996	9	1308		359.996		6	4.124	637.561	220	1202		447.561		6	4.124	1082.37	485	2925		582.365
								interface average	327.055							interface average	396.837							interface average	640.705
	Cytosol	ROI1	11	4.124	992.219	89	2196		901.219		11	4.124	925.406	369	1803		735.406		11	4.124	2275.99	847	4095		1775.99
			12	4.124	971.765	166	2520		880.765		12	4.124	919.306	311	1898		729.306		12	4.124	1998.47	947	4095		1498.47
								Cytosol average	890.992							Cytosol average	732.356							Cysotol average	1637.23
		ROI2	11	4.124	837.188	202	1850		746.188		11	4.124	764.61	207	1747		574.61		11	4.124	2246.7	943	4095		1746.7
			12	4.124	967.86	131	1999		876.86		12	4.124	799.168	323	1531		609.168		12	4.124	2147.03	911	4095		1647.03
								Cytosol average	811.524							Cytosol average	591.889							Cysotol average	1696.87
		ROI3	11	4.124	1109.84	263	2338		1018.84		11	4.124	733.44	95	1674		543.44		11	4.124	2616.43	934	4095		2116.43
			12	4.124	1052.48	107	2230		961.481		12	4.124	708.673	227	1554		518.673		12	4.124	1707.53	730	4095		1207.53
								Cytosol average	990.16							Cytosol average	531.057							Cysotol average	1661.98
	Basal 1 DLIE cell2
			Channel1 - ELKS	Area	Mean	Min	Max	Background	Mean (Background subtracted)		Channel 2 - Liprin	Area	Mean	Min	Max	Background	Background Subtracted		Channel 3 - Insulin	Area	Mean	Min	Max	Background	Background subtracted
			Z								Z								Z
	ECM-cell interface	ROI1	6	4.124	609.288	70	1546	253	356.288		6	4.124	692.963	205	1663	270	422.963		6	4.124	1184.25	498	3794	750	434.251
			7	4.124	815.97	130	1950		562.97		7	4.124	756.428	240	1551		486.428		7	4.124	1201.49	410	2796		451.49
								interface average	459.629							interface average	454.695							interface average	442.87
		ROI2	6	4.124	408.527	0	1037		155.527		6	4.124	602.771	210	1554		332.771		6	4.124	1617.98	767	3164		867.985
			7	4.124	452.331	1	1186		199.331		7	4.124	690.415	138	1571		420.415		7	4.124	2422.44	890	4095		1672.44
								interface average	177.429							interface average	376.593							interface average	1270.21
		ROI3	6	4.124	706.776	98	2148		453.776		6	4.124	662.932	202	1326		392.932		6	4.124	947.718	506	1925		197.718
			7	4.124	771.434	84	1769		518.434		7	4.124	704.133	262	1342		434.133		7	4.124	1036.63	593	2124		286.632
								interface average	486.105							interface average	413.533							interface average	242.175
	Cytosol	ROI1	10	4.124	812.764	107	2019		559.764		10	4.124	827.087	274	1528		557.087		10	4.124	2249.97	921	4095		1499.97
			11	4.124	859.167	83	2845		606.167		11	4.124	796.023	255	1513		526.023		11	4.124	2208.37	696	4095		1458.37
								Cytosol average	582.966							Cytosol average	541.555							Cysotol average	1479.17
		ROI2	10	4.124	633.271	41	1462		380.271		10	4.124	785.123	297	1661		515.123		10	4.124	1171.59	466	2889		421.594
			11	4.124	608.489	34	1892		355.489		11	4.124	813.307	228	1775		543.307		11	4.124	1395.37	569	4095		645.372
								Cytosol average	367.88							Cytosol average	529.215							Cysotol average	533.483
		ROI3	10	4.124	1185.57	168	2586		932.573		10	4.124	838.356	322	1804		568.356		10	4.124	1495.34	688	4095		745.337
			11	4.124	1195.92	217	2773		942.916		11	4.124	839.246	349	1673		569.246		11	4.124	1668.7	691	4095		918.699
								Cytosol average	937.745							Cytosol average	568.801							Cysotol average	832.018
	Basal 2 DLIE cell1
			Channel1 - ELKS	Area	Mean	Min	Max	Background	Mean (Background subtracted)		Channel 2 - Liprin	Area	Mean	Min	Max	Background	Background Subtracted		Channel 3 - Insulin	Area	Mean	Min	Max	Background	Background subtracted
			Z								Z								Z
	ECM-cell interface	ROI1	4	4.124	443.951	0	1346	190	253.951		4	4.124	773.621	109	2059	210	563.621		4	4.124	942.08	203	2563	207	735.08
			5	4.124	676.09	100	1950		486.09		5	4.124	999.669	183	2331		789.669		5	4.124	1150.25	303	2304		943.25
								interface average	370.021							interface average	676.645							interface average	839.165
		ROI2	4	4.124	614.986	9	1783		424.986		4	4.124	677.484	92	1783		467.484		4	4.124	643.485	56	2196		436.485
			5	4.124	718.461	19	1885		528.461		5	4.124	758.167	181	2169		548.167		5	4.124	833.37	117	2555		626.37
								interface average	476.724							interface average	507.826							interface average	531.428
		ROI3	4	4.124	959.053	279	2563		769.053		4	4.124	494.601	0	1593		284.601		4	4.124	807.06	95	2059		600.06
			5	4.124	1165.56	303	2304		975.556		5	4.124	589.421	0	2257		379.421		5	4.124	1015.27	183	2331		808.271
								interface average	872.304							interface average	332.011							interface average	704.165
	Cytosol	ROI1	9	4.124	514.208	24	1532		324.208		9	4.124	715.105	45	1885		505.105		9	4.124	654.314	24	2045		447.314
			10	4.124	522.679	56	1384		332.679		10	4.124	702.022	53	2566		492.022		10	4.124	633.567	56	2360		426.567
								Cytosol average	328.443							Cytosol average	498.564							Cysotol average	436.94
		ROI2	9	4.124	957.551	56	3247		767.551		9	4.124	865.128	122	2177		655.128		9	4.124	887.016	37	3247		680.016
			10	4.124	946.845	76	2900		756.845		10	4.124	862.232	58	2360		652.232		10	4.124	882.943	76	2900		675.943
								Cytosol average	762.198							Cytosol average	653.68							Cysotol average	677.979
		ROI3	9	4.124	1316.65	376	3095		1126.65		9	4.124	1165.2	129	3095		955.203		9	4.124	1152.07	129	3095		945.074
			10	4.124	1279.07	309	2875		1089.07		10	4.124	1252.46	309	2688		1042.46		10	4.124	1274.54	185	2819		1067.54
								Cytosol average	1107.86							Cytosol average	998.831							Cysotol average	1006.31
	Basal 2 DLIE cell2
			Channel1 - ELKS	Area	Mean	Min	Max	Background	Mean (Background subtracted)		Channel 2 - Liprin	Area	Mean	Min	Max	Background	Background Subtracted		Channel 3 - Insulin	Area	Mean	Min	Max	Background	Background subtracted
			Z								Z								Z
	ECM-cell interface	ROI1	5	4.124	485.407	38	1462	200	285.407		5	4.124	288.826	0	1270	195	93.826		5	4.124	514.551	40	1462	210	304.551
			6	4.124	666.444	0	1798		466.444		6	4.124	402.237	0	1190		207.237		6	4.124	748.423	118	1871		538.423
								interface average	375.925							interface average	150.532							interface average	421.487
		ROI2	5	4.124	285.051	0	1004		85.051		5	4.124	288.148	0	1118		93.148		5	4.124	320.114	0	1270		110.114
			6	4.124	414.736	0	1498		214.736		6	4.124	413.062	0	1498		218.062		6	4.124	474.266	35	1259		264.266
								interface average	149.893							interface average	155.605							interface average	187.19
		ROI3	5	4.124	326.101	0	1270		126.101		5	4.124	521.407	38	1462		326.407		5	4.124	261.326	0	962		51.326
			6	4.124	452.837	35	1190		252.837		6	4.124	736.264	82	1871		541.264		6	4.124	508.566	11	1628		298.566
								interface average	189.469							interface average	433.836							interface average	174.946
	Cytosol	ROI1	8	4.124	600.488	65	1460		400.488		8	4.124	584.644	60	1460		389.644		8	4.124	841.626	99	2075		631.626
			9	4.124	715.898	55	1577		515.898		9	4.124	698.477	55	1577		503.477		9	4.124	814.102	137	1833		604.102
								Cytosol average	458.193							Cytosol average	446.56							Cysotol average	617.864
		ROI2	8	4.124	559.084	0	1586		359.084		8	4.124	520.66	0	1643		325.66		8	4.124	588.023	66	1586		378.023
			9	4.124	554.801	64	1394		354.801		9	4.124	527.657	33	1394		332.657		9	4.124	565.668	72	1582		355.668
								Cytosol average	356.942							Cytosol average	329.159							Cysotol average	366.846
		ROI3	8	4.124	930.543	99	2271		730.543		8	4.124	862.023	99	2271		667.023		8	4.124	577.747	9	1628		367.747
			9	4.124	935.848	21	1952		735.848		9	4.124	877.545	204	1863		682.545		9	4.124	626.91	36	1825		416.91
								Cytosol average	733.196							Cytosol average	674.784							Cysotol average	392.328
	Basal 3 DLIE cell1
			Channel1 - ELKS	Area	Mean	Min	Max	Background	Mean (Background subtracted)		Channel 2 - Liprin	Area	Mean	Min	Max	Background	Background Subtracted		Channel 3 - Insulin	Area	Mean	Min	Max	Background	Background subtracted
			Z								Z								Z
	ECM-cell interface	ROI1	5	4.124	393.275	0	1353	187	206.275		5	4.124	522.756	97	1116	212	310.756		5	4.124	1097.34	412	3306	720	377.344
			6	4.124	539.948	49	1296		352.948		6	4.124	635.051	162	1324		423.051		6	4.124	1231.36	541	2804		511.364
								interface average	279.611							interface average	366.904							interface average	444.354
		ROI2	5	4.124	559.841	35	2186		372.841		5	4.124	653.189	109	1327		441.189		5	4.124	1037.1	466	2610		317.096
			6	4.124	821.053	25	2288		634.053		6	4.124	711.556	170	1475		499.556		6	4.124	1027.71	494	2046		307.713
								interface average	503.447							interface average	470.373							interface average	312.404
		ROI3	5	4.124	239.451	0	1065		52.451		5	4.124	385.582	57	1027		173.582		5	4.124	1111.57	501	3095		391.566
			6	4.124	358.103	10	1298		171.103		6	4.124	502.475	136	1206		290.475		6	4.124	1385.47	469	3228		665.473
								interface average	111.777							interface average	232.029							interface average	528.519
	Cytosol	ROI1	8	4.124	531.363	52	1298		344.363		8	4.124	679.555	165	1259		467.555		8	4.124	1653.92	639	4095		933.917
			9	4.124	590.433	119	1428		403.433		9	4.124	698.965	175	1469		486.965		9	4.124	1790.82	611	4095		1070.82
								Cytosol average	373.898							Cytosol average	477.26							Cysotol average	1002.37
		ROI2	8	4.124	785.505	42	2050		598.505		8	4.124	743.132	297	1458		531.132		8	4.124	1161.96	569	2468		441.958
			9	4.124	831.471	23	1920		644.471		9	4.124	784.283	316	1365		572.283		9	4.124	1133.99	662	3293		413.986
								Cytosol average	621.488							Cytosol average	551.707							Cysotol average	427.972
		ROI3	8	4.124	821.359	176	2186		634.359		8	4.124	852.302	309	1889		640.302		8	4.124	1475.77	477	4095		755.77
			9	4.124	878.158	108	2142		691.158		9	4.124	947.099	372	2391		735.099		9	4.124	1532.79	506	4095		812.792
								Cytosol average	662.759							Cytosol average	687.701							Cysotol average	784.281
	Basal 3 DLIE cell2
			Channel1 - ELKS	Area	Mean	Min	Max	Background	Mean (Background subtracted)		Channel 2 - Liprin	Area	Mean	Min	Max	Background	Background Subtracted		Channel 3 - Insulin	Area	Mean	Min	Max	Background	Background subtracted
			Z								Z								Z
	ECM-cell interface	ROI1	6	4.124	418.074	9	1136	191	227.074		6	4.124	467.879	145	1039	239	228.879		6	4.124	186.837	0	1094	232	-45.163
			7	4.124	727.392	23	1947		536.392		7	4.124	609.36	148	1635		370.36		7	4.124	610.863	148	1635		378.863
								interface average	381.733							interface average	299.62							interface average	166.85
		ROI2	6	4.124	440.961	2	1187		249.961		6	4.124	477.869	98	1151		238.869		6	4.124	510.949	90	1452		278.949
			7	4.124	682.91	23	1825		491.91		7	4.124	616.758	157	1341		377.758		7	4.124	633.482	130	1310		401.482
								interface average	370.935							interface average	308.314							interface average	340.216
		ROI3	6	4.124	406.802	0	1227		215.802		6	4.124	437.663	59	1452		198.663		6	4.124	493.502	51	1211		261.502
			7	4.124	660.339	2	1806		469.339		7	4.124	535.147	78	1310		296.147		7	4.124	616.489	164	1797		384.489
								interface average	342.571							interface average	247.405							interface average	322.995
	Cytosol	ROI1	10	4.124	852.028	53	2069		661.028		10	4.124	761.925	254	1570		522.925		10	4.124	757.061	254	1570		525.061
			11	4.124	876.669	154	1820		685.669		11	4.124	765.621	268	1413		526.621		11	4.124	753.298	268	1413		521.298
								Cytosol average	673.349							Cytosol average	524.773							Cysotol average	523.179
		ROI2	10	4.124	741.01	131	1965		550.01		10	4.124	763.736	221	1569		524.736		10	4.124	539.922	92	1067		307.922
			11	4.124	836.405	68	1745		645.405		11	4.124	771.197	221	1604		532.197		11	4.124	547.213	109	1419		315.213
								Cytosol average	597.707							Cytosol average	528.466							Cysotol average	311.567
		ROI3	10	4.124	471.737	17	1278		280.737		10	4.124	534.866	105	1112		295.866		10	4.124	777.433	170	1569		545.433
			11	4.124	490.425	0	1420		299.425		11	4.124	545.705	81	1419		306.705		11	4.124	796.046	216	1604		564.046
								Cytosol average	290.081							Cytosol average	301.286							Cysotol average	554.74

## Sheet: 2-min Stim
	Stim 2min1 DLIE cell1
			Channel1 - ELKS	Area	Mean	Min	Max	Background	Mean (Background subtracted)		Channel 2 - Liprin	Area	Mean	Min	Max	Background	Background Subtracted		Channel 3 - Insulin	Area	Mean	Min	Max	Background	Background subtracted
			Z								Z								Z
	ECM-cell interface	ROI1	7	4.124	989.631	119	2203	163	826.631		7	4.124	389.422	47	1120	182	207.422		7	4.124	1351.01	526	3549	513	838.011
			8	4.124	1374.42	275	3128		1211.42		8	4.124	503.478	113	1305		321.478		8	4.124	1705.18	503	3969		1192.18
								interface average	1019.02							interface average	264.45							interface average	1015.09
		ROI2	7	4.124	423.042	0	1254		260.042		7	4.124	499.785	56	1185		317.785		7	4.124	583.904	295	1448		70.904
			8	4.124	632.464	40	1724		469.464		8	4.124	575.988	154	1590		393.988		8	4.124	713.949	257	2408		200.949
								interface average	364.753							interface average	355.887							interface average	135.926
		ROI3	7	4.124	368.285	0	1082		205.285		7	4.124	319.652	35	1144		137.652		7	4.124	754.256	355	2105		241.256
			8	4.124	589.329	39	1773		426.329		8	4.124	379.806	67	1543		197.806		8	4.124	994.947	407	2695		481.947
								interface average	315.807							interface average	167.729							interface average	361.601
	Cytosol	ROI1	10	4.124	1639.84	224	3388		1476.84		10	4.124	597.071	167	1244		415.071		10	4.124	1810.41	859	3644		1297.41
			11	4.124	1466.44	262	2983		1303.44		11	4.124	605.443	137	1278		423.443		11	4.124	1967.75	713	4095		1454.75
								Cytosol average	1390.14							Cytosol average	419.257							Cysotol average	1376.08
		ROI2	10	4.124	991.967	285	2086		828.967		10	4.124	681.013	193	1423		499.013		10	4.124	1049.55	382	2964		536.553
			11	4.124	1201.86	229	2367		1038.86		11	4.124	682.767	224	1325		500.767		11	4.124	995.335	343	3260		482.335
								Cytosol average	933.911							Cytosol average	499.89							Cysotol average	509.444
		ROI3	10	4.124	854.38	176	1937		691.38		10	4.124	534.601	107	1233		352.601		10	4.124	1661.52	472	4095		1148.52
			11	4.124	864.359	109	2410		701.359		11	4.124	510.853	58	1237		328.853		11	4.124	1514.03	550	3670		1001.03
								Cytosol average	696.37							Cytosol average	340.727							Cysotol average	1074.78
	Stim 2min1 DLIE cell2
			Channel1 - ELKS	Area	Mean	Min	Max	Background	Mean (Background subtracted)		Channel 2 - Liprin	Area	Mean	Min	Max	Background	Background Subtracted		Channel 3 - Insulin	Area	Mean	Min	Max	Background	Background subtracted
			Z								Z								Z
	ECM-cell interface	ROI1	7	4.124	1112.75	292	2425	199	913.75		7	4.124	532.074	116	1282	229	303.074		7	4.124	706.604	347	1712	519	187.604
			8	4.124	1148.11	243	2417		949.112		8	4.124	578.362	158	1285		349.362		8	4.124	717.093	324	1282		198.093
								interface average	931.431							interface average	326.218							interface average	192.849
		ROI2	7	4.124	970.924	136	2669		771.924		7	4.124	626.384	141	1398		397.384		7	4.124	880.359	416	1963		361.359
			8	4.124	914.283	108	2154		715.283		8	4.124	674.322	234	1390		445.322		8	4.124	852.516	451	2071		333.516
								interface average	743.603							interface average	421.353							interface average	347.438
		ROI3	7	4.124	703.014	39	1697		504.014		7	4.124	550.546	116	1278		321.546		7	4.124	488.1	265	1399		-30.9
			8	4.124	825.058	72	2585		626.058		8	4.124	589.117	140	1233		360.117		8	4.124	477.262	267	1115		-41.738
								interface average	565.036							interface average	340.832							interface average	0
	Cytosol	ROI1	10	4.124	921.268	180	2728		722.268		10	4.124	659.14	185	1317		430.14		10	4.124	584.938	316	1242		65.938
			11	4.124	900.347	167	2577		701.347		11	4.124	698.724	165	1473		469.724		11	4.124	587.857	315	1205		68.857
								Cytosol average	711.808							Cytosol average	449.932							Cysotol average	67.3975
		ROI2	10	4.124	834.071	179	2550		635.071		10	4.124	654.958	149	1673		425.958		10	4.124	639.9	313	1248		120.9
			11	4.124	702.669	108	1725		503.669		11	4.124	641.406	100	1590		412.406		11	4.124	679.935	282	1956		160.935
								Cytosol average	569.37							Cytosol average	419.182							Cysotol average	140.917
		ROI3	10	4.124	1165.01	173	2557		966.011		10	4.124	706.624	287	1708		477.624		10	4.124	661.122	416	1256		142.122
			11	4.124	1215.15	272	3112		1016.15		11	4.124	730.378	227	1505		501.378		11	4.124	714.293	409	2044		195.293
								Cytosol average	991.083							Cytosol average	489.501							Cysotol average	168.707
	Stim 2min2 DLIE cell1
			Channel1 - ELKS	Area	Mean	Min	Max	Background	Mean (Background subtracted)		Channel 2 - Liprin	Area	Mean	Min	Max	Background	Background Subtracted		Channel 3 - Insulin	Area	Mean	Min	Max	Background	Background subtracted
			Z								Z								Z
	ECM-cell interface	ROI1	5	4.124	509.185	44	1335	291	218.185		5	4.124	1102.35	348	2730	289	813.354		5	4.124	1984.96	697	4095	756	1228.96
			6	4.124	608.725	81	1563		317.725		6	4.124	1091.91	313	2527		802.906		6	4.124	2406.76	869	4095		1650.76
								interface average	267.955							interface average	808.13							interface average	1439.86
		ROI2	5	4.124	498.321	19	1329		207.321		5	4.124	755.892	98	2155		466.892		5	4.124	999.337	403	4095		243.337
			6	4.124	544.064	0	1480		253.064		6	4.124	712.182	235	1634		423.182		6	4.124	1021.2	431	3045		265.199
								interface average	230.192							interface average	445.037							interface average	254.268
		ROI3	5	4.124	1146.93	264	4095		855.934		5	4.124	512.432	99	1375		223.432		5	4.124	2114.83	633	4095		1358.83
			6	4.124	1359.78	205	4095		1068.78		6	4.124	571.987	170	1201		282.987		6	4.124	2259.45	522	4095		1503.45
								interface average	962.355							interface average	253.209							interface average	1431.14
	Cytosol	ROI1	9	4.124	852.115	148	2016		561.115		9	4.124	826.187	151	2132		537.187		9	4.124	1256.29	496	4095		500.292
			10	4.124	913.76	205	2137		622.76		10	4.124	918.585	230	2561		629.585		10	4.124	1080.36	557	2807		324.363
								Cytosol average	591.938							Cytosol average	583.386							Cysotol average	412.327
		ROI2	9	4.124	668.851	13	1863		377.851		9	4.124	1140.36	239	2438		851.364		9	4.124	2781.83	474	4095		2025.83
			10	4.124	762.428	118	2174		471.428		10	4.124	1114.67	449	2689		825.67		10	4.124	2595.94	1008	4095		1839.94
								Cytosol average	424.639							Cytosol average	838.517							Cysotol average	1932.88
		ROI3	9	4.124	2006.9	392	4095		1715.9		9	4.124	805.201	228	1512		516.201		9	4.124	1628.26	573	4095		872.258
			10	4.124	1781.34	530	4095		1490.34		10	4.124	817.834	276	1490		528.834		10	4.124	1831.73	638	4095		1075.73
								Cytosol average	1603.12							Cytosol average	522.517							Cysotol average	973.993
	Stim 2min2 DLIE cell2
			Channel1 - ELKS	Area	Mean	Min	Max	Background	Mean (Background subtracted)		Channel 2 - Liprin	Area	Mean	Min	Max	Background	Background Subtracted		Channel 3 - Insulin	Area	Mean	Min	Max	Background	Background subtracted
			Z								Z								Z
	ECM-cell interface	ROI1	4	4.124	1523.45	363	4095	404	1119.45		4	4.124	966.142	98	2933	293	673.142		4	4.124	1576.78	549	4095	622	954.783
			5	4.124	1891.16	389	4095		1487.16		5	4.124	1100.12	122	3766		807.12		5	4.124	1735.34	603	4095		1113.34
								interface average	1303.31							interface average	740.131							interface average	1034.06
		ROI2	4	4.124	884.852	28	3241		480.852		4	4.124	955.927	10	2620		662.927		4	4.124	512.207	261	1459		-109.793
			5	4.124	1007.14	109	3321		603.145		5	4.124	1093.37	21	3407		800.374		5	4.124	542.086	254	1149		-79.914
								interface average	541.998							interface average	731.65							interface average	0
		ROI3	4	4.124	1001	125	2537		597		4	4.124	471.286	91	1319		178.286		4	4.124	969.779	375	3237		347.779
			5	4.124	1373.62	353	3535		969.618		5	4.124	507.693	85	1357		214.693		5	4.124	1079.8	509	2780		457.804
								interface average	783.309							interface average	196.489							interface average	402.792
	Cytosol	ROI1	7	4.124	1765.05	353	4095		1361.05		7	4.124	786.852	252	1563		493.852		7	4.124	1327.72	402	4095		705.721
			8	4.124	1580	451	4033		1176		8	4.124	825.225	255	2036		532.225		8	4.124	1324.23	349	4095		702.233
								Cytosol average	1268.53							Cytosol average	513.038							Cysotol average	703.977
		ROI2	7	4.124	1456.42	392	3049		1052.42		7	4.124	1037.45	310	2644		744.455		7	4.124	1372.49	532	3657		750.488
			8	4.124	1467.97	196	3330		1063.97		8	4.124	954.908	307	2238		661.908		8	4.124	1262.16	554	3392		640.163
								Cytosol average	1058.19							Cytosol average	703.181							Cysotol average	695.326
		ROI3	7	4.124	1364.86	109	3538		960.857		7	4.124	591.149	99	1387		298.149		7	4.124	1033.48	287	4095		411.476
			8	4.124	1410.51	206	3380		1006.51		8	4.124	656.742	193	1482		363.742		8	4.124	1031.08	324	3379		409.084
								Cytosol average	983.683							Cytosol average	330.945							Cysotol average	410.28
	Stim 2min3 DLIE cell1
			Channel1 - ELKS	Area	Mean	Min	Max	Background	Mean (Background subtracted)		Channel 2 - Liprin	Area	Mean	Min	Max	Background	Background Subtracted		Channel 3 - Insulin	Area	Mean	Min	Max	Background	Background subtracted
			Z								Z								Z
	ECM-cell interface	ROI1	3	4.124	532.793	0	1747	310	222.793		3	4.124	516.962	87	1232	224	292.962		3	4.124	684.258	262	3224	567	117.258
			4	4.124	548.048	0	1653		238.048		4	4.124	619.171	164	1198		395.171		4	4.124	657.9	237	1896		90.9
								interface average	230.421							interface average	344.067							interface average	104.079
		ROI2	3	4.124	591.242	4	2121		281.242		3	4.124	535.844	130	1393		311.844		3	4.124	721.761	363	1664		154.761
			4	4.124	811.586	3	2313		501.586		4	4.124	626.524	153	1300		402.524		4	4.124	822.66	362	2626		255.66
								interface average	391.414							interface average	357.184							interface average	205.21
		ROI3	3	4.124	663.972	9	3757		353.972		3	4.124	382.609	51	950		158.609		3	4.124	1057.87	436	2468		490.872
			4	4.124	811.181	45	2735		501.181		4	4.124	427.498	49	1276		203.498		4	4.124	1055.81	367	2556		488.809
								interface average	427.577							interface average	181.053							interface average	489.841
	Cytosol	ROI1	7	4.124	804.356	28	2170		494.356		7	4.124	596.467	180	1619		372.467		7	4.124	734.556	391	1633		167.556
			8	4.124	838.491	42	2091		528.491		8	4.124	578.466	152	1544		354.466		8	4.124	833.77	399	3080		266.77
								Cytosol average	511.423							Cytosol average	363.466							Cysotol average	217.163
		ROI2	7	4.124	775.984	102	1979		465.984		7	4.124	762.608	288	1401		538.608		7	4.124	778.207	400	1598		211.207
			8	4.124	762.338	153	1962		452.338		8	4.124	790.126	306	1455		566.126		8	4.124	800.795	423	1815		233.795
								Cytosol average	459.161							Cytosol average	552.367							Cysotol average	222.501
		ROI3	7	4.124	889.916	14	2668		579.916		7	4.124	731.927	259	1511		507.927		7	4.124	800.163	402	2072		233.163
			8	4.124	929.161	44	2611		619.161		8	4.124	756.274	306	1608		532.274		8	4.124	764.402	373	1686		197.402
								Cytosol average	599.538							Cytosol average	520.101							Cysotol average	215.283
	Basal 3 DLIE cell2
			Channel1 - ELKS	Area	Mean	Min	Max	Background	Mean (Background subtracted)		Channel 2 - Liprin	Area	Mean	Min	Max	Background	Background Subtracted		Channel 3 - Insulin	Area	Mean	Min	Max	Background	Background subtracted
			Z								Z								Z
	ECM-cell interface	ROI1	4	4.124	3156.81	482	4095	441	2715.81		4	4.124	575.173	100	1649	282	293.173		4	4.124	1908.46	783	4095	561	1347.46
			5	4.124	3469.99	638	4095		3028.99		5	4.124	585.309	131	1715		303.309		5	4.124	1969.63	757	4095		1408.63
								interface average	2872.4							interface average	298.241							interface average	1378.04
		ROI2	4	4.124	2615.16	158	4095		2174.16		4	4.124	875.214	162	1892		593.214		4	4.124	702.875	289	2024		141.875
			5	4.124	2823.47	220	4095		2382.47		5	4.124	875.526	154	1770		593.526		5	4.124	703.578	317	2412		142.578
								interface average	2278.32							interface average	593.37							interface average	142.226
		ROI3	4	4.124	2580.27	596	4095		2139.27		4	4.124	630.939	200	1383		348.939		4	4.124	498.267	244	1233		0
			5	4.124	2441.31	520	4095		2000.31		5	4.124	657.954	197	1762		375.954		5	4.124	669.332	297	2701		108.332
								interface average	2069.79							interface average	362.446							interface average	54.166
	Cytosol	ROI1	8	4.124	3512.86	824	4095		3071.86		8	4.124	601.556	102	1292		319.556		8	4.124	1789.87	512	4095		1228.87
			9	4.124	3323.98	470	4095		2882.98		9	4.124	633.142	170	1418		351.142		9	4.124	1921.12	639	3986		1360.12
								Cytosol average	2977.42							Cytosol average	335.349							Cysotol average	1294.5
		ROI2	8	4.124	1793.58	158	4095		1352.58		8	4.124	808.309	259	1599		526.309		8	4.124	2115.32	715	4095		1554.32
			9	4.124	2543.17	231	4095		2102.17		9	4.124	815.596	274	1559		533.596		9	4.124	2412.49	865	4095		1851.49
								Cytosol average	1727.38							Cytosol average	529.952							Cysotol average	1702.91
		ROI3	8	4.124	3172.56	63	4095		2731.56		8	4.124	758.147	102	1868		476.147		8	4.124	1697.72	554	3981		1136.72
			9	4.124	3349.76	53	4095		2908.76		9	4.124	783.534	178	1461		501.534		9	4.124	1729.76	613	3940		1168.76
								Cytosol average	2820.16							Cytosol average	488.841							Cysotol average	1152.74

## Sheet: 20-min Stim
	Stim 20min1 DLIE cell1
			Channel1 - ELKS	Area	Mean	Min	Max	Background	Mean (Background subtracted)		Channel 2 - Liprin	Area	Mean	Min	Max	Background	Background Subtracted		Channel 3 - Insulin	Area	Mean	Min	Max	Background	Background subtracted
			Z								Z								Z
	ECM-cell interface	ROI1	4	4.124	2447.72	825	4095	772	1675.72		4	4.124	1156.16	300	2581	400	756.162		4	4.124	2977.42	831	4095	857	2120.42
			5	4.124	2903.77	970	4095		2131.77		5	4.124	1187	375	2459		786.999		5	4.124	3395.64	787	4095		2538.64
								interface average	1903.74							interface average	771.581							interface average	2329.53
		ROI2	4	4.124	1891.98	679	3645		1119.98		4	4.124	894.114	265	1891		494.114		4	4.124	2852.08	880	4095		1995.08
			5	4.124	2025.85	809	4011		1253.85		5	4.124	951.894	237	2222		551.894		5	4.124	2393.75	856	4095		1536.75
								interface average	1186.92							interface average	523.004							interface average	1765.91
		ROI3	4	4.124	1961.89	489	3834		1189.89		4	4.124	875.448	144	1922		475.448		4	4.124	2448.56	416	4095		1591.56
			5	4.124	2513.07	461	4095		1741.07		5	4.124	901.911	214	1869		501.911		5	4.124	2479.53	449	4095		1622.53
								interface average	1465.48							interface average	488.679							interface average	1607.05
	Cytosol	ROI1	8	4.124	2503.48	1128	4095		1731.48		8	4.124	1057.64	434	2156		657.645		8	4.124	2662.4	660	4095		1805.4
			9	4.124	2454.73	1205	4095		1682.73		9	4.124	1034.31	418	2245		634.309		9	4.124	2460.57	508	4095		1603.57
								Cytosol average	1707.11							Cytosol average	645.977							Cysotol average	1704.49
		ROI2	8	4.124	1876.1	617	4095		1104.1		8	4.124	995.902	59	2244		595.902		8	4.124	1791.39	709	4095		934.39
			9	4.124	1914.72	827	3765		1142.72		9	4.124	929.358	214	2355		529.358		9	4.124	2090.12	645	4095		1233.12
								Cytosol average	1123.41							Cytosol average	562.63							Cysotol average	1083.76
		ROI3	8	4.124	2738.62	576	4095		1966.62		8	4.124	1020.63	444	1964		620.629		8	4.124	3594.9	1328	4095		2737.9
			9	4.124	2633.32	648	4095		1861.32		9	4.124	1066.02	347	2142		666.021		9	4.124	3280.29	1453	4095		2423.29
								Cytosol average	1913.97							Cytosol average	643.325							Cysotol average	2580.6
	Stim 20min1 DLIE cell2
			Channel1 - ELKS	Area	Mean	Min	Max	Background	Mean (Background subtracted)		Channel 2 - Liprin	Area	Mean	Min	Max	Background	Background Subtracted		Channel 3 - Insulin	Area	Mean	Min	Max	Background	Background subtracted
			Z								Z								Z
	ECM-cell interface	ROI1	4	4.124	1566.31	379	4095	651	915.309		4	4.124	868.975	125	2081	307	561.975		4	4.124	1085.57	480	4017	715	370.565
			5	4.124	1915.93	660	4095		1264.93		5	4.124	910.354	281	1894		603.354		5	4.124	1375.32	396	3908		660.32
								interface average	1090.12							interface average	582.665							interface average	515.442
		ROI2	4	4.124	1191.3	203	3604		540.295		4	4.124	765.331	81	1854		458.331		4	4.124	1065.93	472	3762		350.928
			5	4.124	1421.25	605	2732		770.251		5	4.124	806.977	111	1686		499.977		5	4.124	1405.86	612	4095		690.86
								interface average	655.273							interface average	479.154							interface average	520.894
		ROI3	4	4.124	1550.35	601	3382		899.346		4	4.124	934.421	227	2220		627.421		4	4.124	1624.09	595	4095		909.092
			5	4.124	1961.95	745	4077		1310.95		5	4.124	962.367	264	2300		655.367		5	4.124	2264.33	782	4095		1549.33
								interface average	1105.15							interface average	641.394							interface average	1229.21
	Cytosol	ROI1	8	4.124	2654.48	895	4095		2003.48		8	4.124	1057.22	390	2058		750.221		8	4.124	2142.71	617	4095		1427.71
			9	4.124	2753.41	767	4095		2102.41		9	4.124	1067	375	2029		760.003		9	4.124	2106.92	647	4095		1391.92
								Cytosol average	2052.95							Cytosol average	755.112							Cysotol average	1409.81
		ROI2	8	4.124	1678.96	452	4095		1027.96		8	4.124	777.302	203	1540		470.302		8	4.124	1473.86	542	3674		758.861
			9	4.124	1635.83	519	3197		984.829		9	4.124	798.297	210	1856		491.297		9	4.124	1541.44	612	3081		826.442
								Cytosol average	1006.4							Cytosol average	480.8							Cysotol average	792.652
		ROI3	8	4.124	1635.18	195	3817		984.181		8	4.124	858.816	42	1824		551.816		8	4.124	2087.35	411	4095		1372.35
			9	4.124	1643.91	201	3769		992.912		9	4.124	844.18	94	2172		537.18		9	4.124	2484.2	445	4095		1769.2
								Cytosol average	988.547							Cytosol average	544.498							Cysotol average	1570.77
	Stim 20min2 DLIE cell1
			Channel1 - ELKS	Area	Mean	Min	Max	Background	Mean (Background subtracted)		Channel 2 - Liprin	Area	Mean	Min	Max	Background	Background Subtracted		Channel 3 - Insulin	Area	Mean	Min	Max	Background	Background subtracted
			Z								Z								Z
	ECM-cell interface	ROI1	4	4.124	730.624	85	2052	345	385.624		4	4.124	608.163	71	2224	298	310.163		4	4.124	789.747	361	2138	734	55.747
			5	4.124	951.596	236	2139		606.596		5	4.124	668.02	49	1583		370.02		5	4.124	884.669	314	2928		150.669
								interface average	496.11							interface average	340.091							interface average	103.208
		ROI2	4	4.124	701.687	43	1892		356.687		4	4.124	656.753	64	2041		358.753		4	4.124	674.014	301	2537		0
			5	4.124	1006.88	203	2224		661.875		5	4.124	687.676	165	1602		389.676		5	4.124	802.867	317	2060		68.867
								interface average	509.281							interface average	374.215							interface average	34.4335
		ROI3	4	4.124	687.832	46	1658		342.832		4	4.124	748.556	141	1838		450.556		4	4.124	1312.99	573	3926		578.995
			5	4.124	868.524	82	2408		523.524		5	4.124	759.289	194	1473		461.289		5	4.124	1506.89	708	3659		772.889
								interface average	433.178							interface average	455.923							interface average	675.942
	Cytosol	ROI1	8	4.124	1158.38	277	2245		813.381		8	4.124	755.901	195	3130		457.901		8	4.124	764.051	348	2851		30.051
			9	4.124	1228.67	267	2844		883.669		9	4.124	731.94	204	2347		433.94		9	4.124	700.28	267	1910		0
								Cytosol average	848.525							Cytosol average	445.921							Cysotol average	15.0255
		ROI2	8	4.124	1190.63	229	3467		845.627		8	4.124	821.507	259	2013		523.507		8	4.124	793.715	376	2241		59.715
			9	4.124	1155.75	104	3028		810.75		9	4.124	876.719	310	2416		578.719		9	4.124	784.668	394	2169		50.668
								Cytosol average	828.188							Cytosol average	551.113							Cysotol average	55.1915
		ROI3	8	4.124	1191.06	256	3661		846.06		8	4.124	949.331	297	1885		651.331		8	4.124	1549.94	785	4095		815.944
			9	4.124	1156.01	205	2726		811.013		9	4.124	999.43	424	1946		701.43		9	4.124	2080.62	661	4026		1346.62
								Cytosol average	828.536							Cytosol average	676.38							Cysotol average	1081.28
	Stim 20min2 DLIE cell2
			Channel1 - ELKS	Area	Mean	Min	Max	Background	Mean (Background subtracted)		Channel 2 - Liprin	Area	Mean	Min	Max	Background	Background Subtracted		Channel 3 - Insulin	Area	Mean	Min	Max	Background	Background subtracted
			Z								Z								Z
	ECM-cell interface	ROI1	4	4.124	697.553	43	1892	315	382.553		4	4.124	488.152	95	1556	274	214.152		4	4.124	1721.73	598	4095	722	999.731
			5	4.124	997.871	203	2224		682.871		5	4.124	624.814	139	1334		350.814		5	4.124	1855.89	804	3918		1133.89
								interface average	532.712							interface average	282.483							interface average	1066.81
		ROI2	4	4.124	895.971	212	1665		580.971		4	4.124	726.055	141	1838		452.055		4	4.124	1116.6	506	2729		394.601
			5	4.124	1185.86	374	2350		870.862		5	4.124	734.897	261	1473		460.897		5	4.124	1503.05	537	4095		781.054
								interface average	725.917							interface average	456.476							interface average	587.828
		ROI3	4	4.124	422.899	13	1409		107.899		4	4.124	690.697	231	1489		416.697		4	4.124	1337.01	573	3926		615.006
			5	4.124	695.559	74	1982		380.559		5	4.124	904.548	267	1775		630.548		5	4.124	1445.39	708	3614		723.392
								interface average	244.229							interface average	523.622							interface average	669.199
	Cytosol	ROI1	8	4.124	1345.16	517	2909		1030.16		8	4.124	1024.15	370	1891		750.153		8	4.124	2140.57	963	4095		1418.57
			9	4.124	1301.09	355	2425		986.093		9	4.124	1190.78	408	2875		916.781		9	4.124	2036.87	881	4013		1314.87
								Cytosol average	1008.13							Cytosol average	833.467							Cysotol average	1366.72
		ROI2	8	4.124	1896.58	771	3660		1581.58		8	4.124	1108.93	393	2030		834.926		8	4.124	2171.01	798	4095		1449.01
			9	4.124	2016.76	788	3438		1701.76		9	4.124	1124.02	468	1975		850.024		9	4.124	1967.17	1028	4095		1245.17
								Cytosol average	1641.67							Cytosol average	842.475							Cysotol average	1347.09
		ROI3	8	4.124	1034.38	293	2263		719.385		8	4.124	816.171	175	1572		542.171		8	4.124	1460.57	721	3386		738.568
			9	4.124	1196.82	373	2402		881.815		9	4.124	890.081	282	1593		616.081		9	4.124	1998.4	661	3973		1276.4
								Cytosol average	800.6							Cytosol average	579.126							Cysotol average	1007.48
	Stim 20min3 DLIE cell1
			Channel1 - ELKS	Area	Mean	Min	Max	Background	Mean (Background subtracted)		Channel 2 - Liprin	Area	Mean	Min	Max	Background	Background Subtracted		Channel 3 - Insulin	Area	Mean	Min	Max	Background	Background subtracted
			Z								Z								Z
	ECM-cell interface	ROI1	4	4.124	780.072	84	1810	321	459.072		4	4.124	538.942	103	1477	280	258.942		4	4.124	894.243	409	2455	723	171.243
			5	4.124	889.797	103	2536		568.797		5	4.124	566.06	101	1334		286.06		5	4.124	1085.8	506	2678		362.796
								interface average	513.935							interface average	272.501							interface average	267.02
		ROI2	4	4.124	604.98	40	1914		283.98		4	4.124	898.689	267	2445		618.689		4	4.124	936.522	368	2464		213.522
			5	4.124	809.457	118	2273		488.457		5	4.124	925.165	237	2817		645.165		5	4.124	1151.84	355	3113		428.837
								interface average	386.219							interface average	631.927							interface average	321.18
		ROI3	4	4.124	524.038	37	1500		203.038		4	4.124	531.623	64	1571		251.623		4	4.124	821.595	337	2006		98.595
			5	4.124	668.985	117	1448		347.985		5	4.124	579.534	120	1314		299.534		5	4.124	940.305	345	3010		217.305
								interface average	275.512							interface average	275.579							interface average	157.95
	Cytosol	ROI1	10	4.124	1297.41	442	2320		976.408		10	4.124	873.398	265	1829		593.398		10	4.124	1225.29	585	3079		502.287
			11	4.124	1235.15	297	2353		914.149		11	4.124	849.9	283	1984		569.9		11	4.124	1190.86	594	3082		467.859
								Cytosol average	945.278							Cytosol average	581.649							Cysotol average	485.073
		ROI2	10	4.124	1045.32	268	2096		724.315		10	4.124	807.89	242	1961		527.89		10	4.124	1466.22	567	3551		743.22
			11	4.124	921.011	250	2014		600.011		11	4.124	781.16	272	1704		501.16		11	4.124	1296.34	562	3953		573.341
								Cytosol average	662.163							Cytosol average	514.525							Cysotol average	658.28
		ROI3	10	4.124	1294.14	229	2946		973.142		10	4.124	692.354	143	1571		412.354		10	4.124	1657	462	4095		933.997
			11	4.124	1483.61	273	3130		1162.61		11	4.124	742.721	181	1690		462.721		11	4.124	1935.64	395	4095		1212.64
								Cytosol average	1067.88							Cytosol average	437.538							Cysotol average	1073.32
	Stim 20min3 DLIE cell2
			Channel1 - ELKS	Area	Mean	Min	Max	Background	Mean (Background subtracted)		Channel 2 - Liprin	Area	Mean	Min	Max	Background	Background Subtracted		Channel 3 - Insulin	Area	Mean	Min	Max	Background	Background subtracted
			Z								Z								Z
	ECM-cell interface	ROI1	4	4.124	899.949	100	2042	305	594.949		4	4.124	753.004	198	1558	308	445.004		4	4.124	1931.76	723	4095	830	1101.76
			5	4.124	1162.21	235	2868		857.214		5	4.124	897.309	360	1797		589.309		5	4.124	2027.22	932	4095		1197.22
								interface average	726.082							interface average	517.157							interface average	1149.49
		ROI2	4	4.124	546.374	18	1674		241.374		4	4.124	569.5	70	1365		261.5		4	4.124	1278.08	606	2581		448.075
			5	4.124	601.973	54	2180		296.973		5	4.124	747.934	210	1977		439.934		5	4.124	1521.63	773	3405		691.633
								interface average	269.173							interface average	350.717							interface average	569.854
		ROI3	4	4.124	745.945	178	1654		440.945		4	4.124	622.494	81	1466		314.494		4	4.124	1051.52	413	2952		221.523
			5	4.124	919.383	273	2029		614.383		5	4.124	652.006	208	1211		344.006		5	4.124	1125.7	470	2847		295.702
								interface average	527.664							interface average	329.25							interface average	258.612
	Cytosol	ROI1	8	4.124	1068.12	225	2773		763.117		8	4.124	923.284	160	3219		615.284		8	4.124	2818.55	802	4095		1988.55
			9	4.124	1211.16	248	4095		906.162		9	4.124	896.408	142	3736		588.408		9	4.124	2935.37	744	4095		2105.37
								Cytosol average	834.639							Cytosol average	601.846							Cysotol average	2046.96
		ROI2	8	4.124	923.618	116	2308		618.618		8	4.124	1056.13	460	1846		748.132		8	4.124	2486.67	1001	4095		1656.67
			9	4.124	898.386	24	2314		593.386		9	4.124	1115.57	371	2086		807.567		9	4.124	2628.51	1033	4095		1798.51
								Cytosol average	606.002							Cytosol average	777.85							Cysotol average	1727.59
		ROI3	8	4.124	1274.19	391	2507		969.186		8	4.124	845.131	172	1694		537.131		8	4.124	1642.88	459	4095		812.881
			9	4.124	1425.01	617	2684		1120.01		9	4.124	869.06	277	1990		561.06		9	4.124	1742.68	331	4095		912.685
								Cytosol average	1044.6							Cytosol average	549.095							Cysotol average	862.783
