# Supplementary material for: Local activation of focal adhesion kinase orchestrates the positioning of presynaptic scaffold proteins and Ca2+ signalling to control glucose-dependent insulin secretion
Source: eLife. 2022 May 13;11:e76262. doi: 10.7554/eLife.76262 (PMC9126582; doi:10.7554/eLife.76262)
Supplement: Figure 9—source data 1. [file elife-76262-fig9-data1.xlsx]

## Sheet: Sheet1
DMSO	725310	678704	196650	775621	277260	833801	48506.7	467204	417864	445965	728602	150467	212257	357726	815833	499753	428185	303303	291507	578859	785360	512387	549903	540569	88936.8	612712	641820	346687	667702	124045	734594	919586	548571	727446	309080	472216	236156	591390	605074	538535	550473	117090	423147	902569	579932	361607	656670	595895	875008
Y15	224499	482715	717910	141477	196340	208510	173672	455594	137847	82085.1	144040	442269	291946	385926	217758	273993	595030	835702	361377	224586	250858	445360	301206	319185	408765	864598	363396	361584	111003	682830	389215	469965	1.63453e+06	894224	129033	421331	587289	386303	249192	347579	564930	571316	419168	902002	469343	398790	353220	517266	556880
			Y15 AUC nm.s
		y15	Mean AUC	584882	SEM AUC	22219.7
		control	mean AUC	715565	STDEV	48464.2
	ttest	8.44807e-05
[truncated: 169 more columns]
