# Supplementary material for: Local activation of focal adhesion kinase orchestrates the positioning of presynaptic scaffold proteins and Ca2+ signalling to control glucose-dependent insulin secretion
Source: eLife. 2022 May 13;11:e76262. doi: 10.7554/eLife.76262 (PMC9126582; doi:10.7554/eLife.76262)
Supplement: Figure 9—source data 2. [file elife-76262-fig9-data2.xlsx]

## Sheet: Sheet1
		Basal				Stim				KCl					t-test stim
	Baseline (DMSO)	0.022046	0.033563	0.031486		0.164669	0.224819	0.229196		0.338086	0.349457	0.340939		y15 stim	0.00657494
	2 μM Y15	0.012421	0.032204	0.032595		0.019999	0.07154	0.126071		0.282882	0.327055	0.343982		high k	0.250931
	Recovery	0.016775	0.017849	0.018235		0.172217	0.193634	0.227542		0.288568	0.35693	0.360033
