# Supplementary material for: Local activation of focal adhesion kinase orchestrates the positioning of presynaptic scaffold proteins and Ca2+ signalling to control glucose-dependent insulin secretion
Source: eLife. 2022 May 13;11:e76262. doi: 10.7554/eLife.76262 (PMC9126582; doi:10.7554/eLife.76262)
Supplement: Figure 9—source data 3. [file elife-76262-fig9-data3.xlsx]

## Sheet: Y15
	Y15 1 cell1, averaged 10pixel
			Channel1 - ELKS	Area	Mean	Min	Max	Background	Mean (Background subtracted)		Channel 2 - Liprin	Area	Mean	Min	Max	Background	Background Subtracted		Channel 3 - Insulin	Area	Mean	Min	Max	Background	Background subtracted
			Z								Z								Z
	ECM-cell interface	ROI1	21	4.044	528.516	245	723	248	280.516		21	4.044	1046.27	492	1263	714	332.274		21	4.044	1009.7	594	1428	482	527.703
								interface average	280.516							interface average	332.274							interface average	527.703
		ROI2	21	4.044	841.59	475	1193		593.59		21	4.044	997.777	654	1370		283.777		21	4.044	1115.22	715	1622		633.219
								interface average	593.59							interface average	283.777							interface average	633.219
		ROI3	21	4.044	581.277	380	790		333.277		21	4.044	990.005	466	1397		276.005		21	4.044	994.737	289	1635		512.737
								interface average	333.277							interface average	276.005							interface average	512.737
	Cytosol	ROI1	16	4.044	767.126	218	962		519.126		16	4.044	1102.16	655	1488		388.163		16	4.044	1347.83	331	2577		865.83
			17	4.044	661.164	157	935		413.164		17	4.044	1039.75	503	1309		325.747		17	4.044	1145.41	346	2033		663.414
								Cytosol average	466.145							Cytosol average	356.955							Cysotol average	764.622
		ROI2	16	4.044	739.324	162	1261		491.324		16	4.044	1131.79	596	1629		417.786		16	4.044	1948.39	431	2678		1466.39
			17	4.044	646.876	145	1047		398.876		17	4.044	1061.82	569	1691		347.815		17	4.044	1716.73	442	2639		1234.73
								Cytosol average	445.1							Cytosol average	382.801							Cysotol average	1350.56
		ROI3	16	4.044	723.256	471	958		475.256		16	4.044	1073.2	571	1288		359.202		16	4.044	1593.86	404	2548		1111.86
			17	4.044	910.879	581	1130		662.879		17	4.044	1036.42	364	1427		322.421		17	4.044	1362.31	195	2065		880.305
								Cytosol average	569.067							Cytosol average	340.812							Cysotol average	996.085
	Y15 1 cell2, averaged 10pixel
			Channel1 - ELKS	Area	Mean	Min	Max	Background	Mean (Background subtracted)		Channel 2 - Liprin	Area	Mean	Min	Max	Background	Background Subtracted		Channel 3 - Insulin	Area	Mean	Min	Max	Background	Background subtracted
			Z								Z								Z
	ECM-cell interface	ROI1	20	4.044	808.896	554	1042	228	580.896		20	4.044	1313.16	1001	1799	641	672.163		20	4.044	1421.35	863	1923	589	832.353
			21	4.044	536.16	364	676		308.16		21	4.044	1148.48	545	1599		507.484		21	4.044	1056.91	619	1554		467.91
								interface average	444.528							interface average	589.823							interface average	650.132
		ROI2	20	4.044	764.501	573	1128		536.501		20	4.044	1116.05	854	1257		475.045		20	4.044	1594.07	877	2106		1005.07
			21	4.044	561.63	432	833		333.63		21	4.044	1040.5	806	1279		399.503		21	4.044	1050.15	407	1400		461.155
								interface average	435.065							interface average	437.274							interface average	733.11
		ROI3	20	4.044	707.111	474	852		479.111		20	4.044	989.217	759	1172		348.217		20	4.044	1682.27	996	2276		1093.27
			21	4.044	569.421	313	725		341.421		21	4.044	926.266	739	1144		285.266		21	4.044	1333.24	714	2016		744.243
								interface average	410.266							interface average	316.741							interface average	918.758
	Cytosol	ROI1	16	4.044	749.978	583	955		521.978		16	4.044	1205.27	1040	1393		564.267		16	4.044	1799.29	1074	2394		1210.29
			17	4.044	729.509	502	892		501.509		17	4.044	1208.17	1049	1362		567.171		17	4.044	1840.48	1080	2489		1251.48
								Cytosol average	511.743							Cytosol average	565.719							Cysotol average	1230.89
		ROI2	16	4.044	875.045	618	1335		647.045		16	4.044	993.356	864	1243		352.356		16	4.044	1763.21	1143	2387		1174.21
			17	4.044	924.951	681	1550		696.951		17	4.044	1016.28	859	1292		375.281		17	4.044	1979.18	1374	2456		1390.18
								Cytosol average	671.998							Cytosol average	363.818							Cysotol average	1282.2
		ROI3	16	4.044	762.807	400	897		534.807		16	4.044	1130.25	864	1262		489.254		16	4.044	2136.92	1571	2481		1547.92
			17	4.044	749.787	292	934		521.787		17	4.044	1122.65	921	1268		481.65		17	4.044	2083.53	1537	2443		1494.53
								Cytosol average	528.297							Cytosol average	485.452							Cysotol average	1521.22
	Y15 2 cell1, averaged 10pixel
			Channel1 - ELKS	Area	Mean	Min	Max	Background	Mean (Background subtracted)		Channel 2 - Liprin	Area	Mean	Min	Max	Background	Background Subtracted		Channel 3 - Insulin	Area	Mean	Min	Max	Background	Background subtracted
			Z								Z								Z
	ECM-cell interface	ROI1	12	4.203	1137.95	684	1506	393	744.949		12	4.203	1303.75	764	1854	797	506.752		12	4.203	744.294	582	913	464	280.294
								interface average	744.949							interface average	506.752							interface average	280.294
		ROI2	12	4.203	1058.27	843	1348		665.27		12	4.203	777.616	632	886		0		12	4.203	814.666	478	1073		350.666
								interface average	665.27							interface average	0							interface average	0
		ROI3	12	4.203	1007.96	479	1360		614.961		12	4.203	736.833	510	924		0		12	4.203	1033.41	732	1197		569.412
								interface average	614.961							interface average	0							interface average	569.412
	Cytosol	ROI1	8	4.203	1211.9	963	1410		818.896		8	4.203	954.93	773	1088		157.93		8	4.203	664.084	484	1101		200.084
			9	4.203	1194.52	1009	1387		801.524		9	4.203	957.586	778	1103		160.586		9	4.203	768.416	486	1681		304.416
								Cytosol average	810.21							Cytosol average	159.258							Cysotol average	252.25
		ROI2	8	4.203	1290.12	530	1814		897.124		8	4.203	966.821	861	1043		169.821		8	4.203	1524.09	690	1937		1060.09
			9	4.203	1130.68	530	1558		737.681		9	4.203	956.626	809	1068		159.626		9	4.203	1759.07	567	2243		1295.07
								Cytosol average	817.403							Cytosol average	164.724							Cysotol average	1177.58
		ROI3	8	4.203	1617.48	1327	1981		1224.48		8	4.203	1006.25	536	1250		209.249		8	4.203	1147.48	728	1738		683.482
			9	4.203	1525.73	1058	1911		1132.73		9	4.203	961.596	637	1261		164.596		9	4.203	988.212	607	1709		524.212
								Cytosol average	1178.6							Cytosol average	186.923							Cysotol average	603.847
	Y15 2 cell2, averaged 10pixel
			Channel1 - ELKS	Area	Mean	Min	Max	Background	Mean (Background subtracted)		Channel 2 - Liprin	Area	Mean	Min	Max	Background	Background Subtracted		Channel 3 - Insulin	Area	Mean	Min	Max	Background	Background subtracted
			Z								Z								Z
	ECM-cell interface	ROI1	11	4.203	778.097	399	960	317	461.097		11	4.203	1044.54	754	1209	650	394.536		11	4.203	978.776	568	1242	400	578.776
								interface average	461.097							interface average	394.536							interface average	578.776
		ROI2	11	4.203	687.056	592	850		370.056		11	4.203	983.936	772	1119		333.936		11	4.203	962.924	701	1179		562.924
									0
								interface average	185.028							interface average	333.936							interface average	562.924
		ROI3	11	4.203	911.731	702	1116		594.731		11	4.203	854.507	766	979		204.507		11	4.203	678.092	294	1052		278.092
								interface average	594.731							interface average	204.507							interface average	278.092
	Cytosol	ROI1	8	4.203	936.193	741	1196		619.193		8	4.203	998.336	687	1126		348.336		8	4.203	819.113	533	985		419.113
			9	4.203	985.334	769	1183		668.334		9	4.203	950.038	655	1081		300.038		9	4.203	889.22	510	1201		489.22
								Cytosol average	643.764							Cytosol average	324.187							Cysotol average	454.167
		ROI2	8	4.203	942.81	595	1138		625.81		8	4.203	959.286	808	1048		309.286		8	4.203	1026.75	719	1175		626.747
			9	4.203	967.11	734	1117		650.11		9	4.203	910.963	768	986		260.963		9	4.203	1003.87	746	1259		603.871
								Cytosol average	637.96							Cytosol average	285.124							Cysotol average	615.309
		ROI3	8	4.203	854.962	657	1192		537.962		8	4.203	1164.86	711	1581		514.856		8	4.203	593.248	360	877		193.248
			9	4.203	797.994	600	1057		480.994		9	4.203	1122.13	803	1419		472.127		9	4.203	616.68	334	1066		216.68
								Cytosol average	509.478							Cytosol average	493.491							Cysotol average	204.964
	Y15 2 cell3, averaged 10pixel
			Channel1 - ELKS	Area	Mean	Min	Max	Background	Mean (Background subtracted)		Channel 2 - Liprin	Area	Mean	Min	Max	Background	Background Subtracted		Channel 3 - Insulin	Area	Mean	Min	Max	Background	Background subtracted
			Z								Z								Z
	ECM-cell interface	ROI1	11	4.203	1228.81	869	1554	369	859.806		11	4.203	818.113	648	935	762	56.113		11	4.203	1207.18	840	1449	451	756.18
								interface average	859.806							interface average	56.113							interface average	756.18
		ROI2	11	4.203	1064.09	874	1322		695.09		11	4.203	864.939	773	951		102.939		11	4.203	919.179	725	1565		468.179
								interface average	695.09							interface average	102.939							interface average	468.179
		ROI3	11	4.203	956.206	849	1089		587.206		11	4.203	804.637	414	911		42.637		11	4.203	1306.87	419	2165		855.868
								interface average	587.206							interface average	42.637							interface average	855.868
	Cytosol	ROI1	7	4.203	737.356	557	919		368.356		7	4.203	834.371	738	885		72.371		7	4.203	660.359	440	1179		209.359
			8	4.203	795.426	610	939		426.426		8	4.203	828.021	721	910		66.021		8	4.203	731.862	446	1052		280.862
								Cytosol average	397.391							Cytosol average	69.196							Cysotol average	245.111
		ROI2	7	4.203	627.178	521	695		258.178		7	4.203	782.032	716	893		20.032		7	4.203	925.356	634	1332		474.356
			8	4.203	661.012	524	783		292.012		8	4.203	794.497	733	875		32.497		8	4.203	779.719	574	1101		328.719
								Cytosol average	275.095							Cytosol average	26.2645							Cysotol average	401.538
		ROI3	7	4.203	1407.7	1000	1666		1038.7		7	4.203	899.328	758	993		137.328		7	4.203	1216.16	689	1777		765.162
			8	4.203	1176.43	885	1586		807.427		8	4.203	860.892	683	931		98.892		8	4.203	1025.83	611	1737		574.827
								Cytosol average	923.064							Cytosol average	118.11							Cysotol average	669.995
	Y15 2 cell4, averaged 10pixel
			Channel1 - ELKS	Area	Mean	Min	Max	Background	Mean (Background subtracted)		Channel 2 - Liprin	Area	Mean	Min	Max	Background	Background Subtracted		Channel 3 - Insulin	Area	Mean	Min	Max	Background	Background subtracted
			Z								Z								Z
	ECM-cell interface	ROI1	12	4.203	903.731	742	1053	221	682.731		12	4.203	669.566	507	857	540	225		12	4.203	806.88	561	989	281	525.88
								interface average	682.731							interface average	225							interface average	525.88
		ROI2	12	4.203	1019.72	633	1359		798.721		12	4.203	625.909	538	866		85.909		12	4.203	626.551	510	746		345.551
								interface average	798.721							interface average	85.909							interface average	345.551
		ROI3	12	4.203	629.687	490	807		408.687		12	4.203	787.394	667	879		247.394		12	4.203	782.594	660	879		501.594
								interface average	408.687							interface average	247.394							interface average	501.594
	Cytosol	ROI1	8	4.203	762.834	631	1096		541.834		8	4.203	1011.57	574	1278		471.574		8	4.203	1280.1	875	1585		999.102
			9	4.203	724.261	610	1010		503.261		9	4.203	1023.54	577	1344		483.539		9	4.203	1257.68	792	1595		976.684
								Cytosol average	522.547							Cytosol average	477.556							Cysotol average	987.893
		ROI2	8	4.203	1107.07	725	1518		886.066		8	4.203	1085.63	720	1508		545.632		8	4.203	863.512	628	1167		582.512
			9	4.203	1078.36	757	1498		857.364		9	4.203	1047.34	745	1496		507.336		9	4.203	773.83	621	1035		492.83
								Cytosol average	871.715							Cytosol average	526.484							Cysotol average	537.671
		ROI3	8	4.203	1060.32	899	1204		839.32		8	4.203	782.333	571	1349		242.333		8	4.203	1090.14	719	1423		809.144
			9	4.203	1067.9	932	1250		846.901		9	4.203	751.203	597	1301		211.203		9	4.203	1098.37	745	1358		817.369
								Cytosol average	843.111							Cytosol average	226.768							Cysotol average	813.256

## Sheet: DMSO
	DMSO1 cell1, averaged 10pixel
			Channel1 - ELKS	Area	Mean	Min	Max	Background	Mean (Background subtracted)		Channel 2 - Liprin	Area	Mean	Min	Max	Background	Background Subtracted		Channel 3 - Insulin	Area	Mean	Min	Max	Background	Background subtracted
			Z								Z								Z
	ECM-cell interface	ROI1	34	4.203	1439.49	899	1724	442	997.488		34	4.203	1274.81	1145	1388	767	507.813		34	4.203	1025.85	670	1555	371	654.847
								interface average	997.488							interface average	507.813							interface average	654.847
		ROI2	34	4.203	1216.98	849	1382		774.983		34	4.203	1476.83	1045	1702		709.833		34	4.203	802.98	534	1295		431.98
								interface average	774.983							interface average	709.833							interface average	431.98
		ROI3	34	4.203	1219.83	411	1573		777.834		34	4.203	1387.93	794	1610		620.93		34	4.203	1042.14	770	1378		671.14
								interface average	777.834							interface average	620.93							interface average	671.14
	Cytosol	ROI1	27	4.203	598.542	452	823		156.542		27	4.203	1122.1	709	1331		355.098		27	4.203	878.832	556	1691		507.832
			28	4.203	629.267	440	817		187.267		28	4.203	1021.05	794	1267		254.049		28	4.203	860.572	499	1379		489.572
								Cytosol average	171.905							Cytosol average	304.573							Cysotol average	498.702
		ROI2	27	4.203	629.328	549	772		187.328		27	4.203	1344.48	1005	1471		577.477		27	4.203	574.693	501	732		203.693
			28	4.203	608.904	536	716		166.904		28	4.203	1288.97	898	1406		521.968		28	4.203	580.928	512	823		209.928
								Cytosol average	177.116							Cytosol average	549.723							Cysotol average	206.81
		ROI3	27	4.203	591.479	553	680		149.479		27	4.203	1382.08	1089	1639		615.082		27	4.203	540.398	425	674		169.398
			28	4.203	619.581	561	706		177.581		28	4.203	1332.07	904	1499		565.07		28	4.203	522.334	470	619		151.334
								Cytosol average	163.53							Cytosol average	590.076							Cysotol average	160.366
	DMSO1 cell2, averaged 10pixel
			Channel1 - ELKS	Area	Mean	Min	Max	Background	Mean (Background subtracted)		Channel 2 - Liprin	Area	Mean	Min	Max	Background	Background Subtracted		Channel 3 - Insulin	Area	Mean	Min	Max	Background	Background subtracted
			Z								Z								Z
	ECM-cell interface	ROI1	34	4.203	1053.95	789	1342	256	797.953		34	4.203	1526.64	768	1761	594	932.638		34	4.203	1603.75	1020	2073	349	1254.75
								interface average	797.953							interface average	932.638							interface average	1254.75
		ROI2	34	4.203	908.023	627	1149		652.023		34	4.203	1486.27	1110	1761		892.266		34	4.203	1638.46	1204	2197		1289.46
								interface average	652.023							interface average	892.266							interface average	1289.46
		ROI3	34	4.203	921.03	577	1117		665.03		34	4.203	1189.99	1007	1315		595.987		34	4.203	976.872	468	1526		627.872
								interface average	665.03							interface average	595.987							interface average	627.872
	Cytosol	ROI1	30	4.203	508.571	387	713		252.571		30	4.203	1220.29	960	1474		626.287		30	4.203	1814.14	845	2608		1465.14
			31	4.203	522.852	372	743		266.852		31	4.203	1172.31	876	1456		578.312		31	4.203	1865.87	935	2782		1516.87
								Cytosol average	259.712							Cytosol average	602.299							Cysotol average	1491
		ROI2	30	4.203	468.776	339	632		212.776		30	4.203	1210.94	989	1492		616.939		30	4.203	860.422	313	1279		511.422
			31	4.203	484.044	321	626		228.044		31	4.203	1150.88	1002	1305		556.884		31	4.203	911.133	343	1334		562.133
								Cytosol average	220.41							Cytosol average	586.912							Cysotol average	536.778
		ROI3	30	4.203	590.229	405	913		334.229		30	4.203	1229.38	820	1526		635.38		30	4.203	1248.35	164	1893		899.354
			31	4.203	568	348	831		312		31	4.203	1187.67	748	1473		593.672		31	4.203	1304.44	175	2147		955.438
								Cytosol average	323.115							Cytosol average	614.526							Cysotol average	927.396
	DMSO1 cell3, averaged 10pixel
			Channel1 - ELKS	Area	Mean	Min	Max	Background	Mean (Background subtracted)		Channel 2 - Liprin	Area	Mean	Min	Max	Background	Background Subtracted		Channel 3 - Insulin	Area	Mean	Min	Max	Background	Background subtracted
			Z								Z								Z
	ECM-cell interface	ROI1	35	4.203	757.678	517	939	343	414.678		35	4.203	1476.93	1029	1944	614	862.933		35	4.203	255.082	135	307	238	17.082
								interface average	414.678							interface average	862.933							interface average	17.082
		ROI2	35	4.203	707.946	512	850		364.946		35	4.203	1493.03	1148	1852		879.026		35	4.203	227.778	167	298		0
								interface average	364.946							interface average	879.026							interface average	0
		ROI3	35	4.203	636.444	303	842		293.444		35	4.203	1427.42	818	1730		813.42		35	4.203	279.652	235	340		262.57
								interface average	293.444							interface average	813.42							interface average	262.57
	Cytosol	ROI1	32	4.203	543.617	285	833		200.617		32	4.203	910.07	584	1555		296.07		32	4.203	498.147	274	902		260.147
			33	4.203	572.616	313	765		229.616		33	4.203	976.984	653	1715		362.984		33	4.203	323.362	255	397		85.362
								Cytosol average	215.116							Cytosol average	329.527							Cysotol average	172.755
		ROI2	32	4.203	593.862	365	808		250.862		32	4.203	1108.76	805	1392		494.763		32	4.203	416.668	125	1171		178.668
			33	4.203	570.788	379	733		227.788		33	4.203	1028.23	715	1388		414.228		33	4.203	446.152	171	1072		208.152
								Cytosol average	239.325							Cytosol average	454.495							Cysotol average	193.41
		ROI3	32	4.203	719.413	463	1024		376.413		32	4.203	1087.29	674	1717		473.294		32	4.203	646.438	211	893		408.438
			33	4.203	626.324	391	780		283.324		33	4.203	925.926	664	1276		311.926		33	4.203	524.439	175	694		286.439
								Cytosol average	329.868							Cytosol average	392.61							Cysotol average	347.438
	DMSO2 cell1, averaged 10pixel
			Channel1 - ELKS	Area	Mean	Min	Max	Background	Mean (Background subtracted)		Channel 2 - Liprin	Area	Mean	Min	Max	Background	Background Subtracted		Channel 3 - Insulin	Area	Mean	Min	Max	Background	Background subtracted
			Z								Z								Z
	ECM-cell interface	ROI1	18	4.003	1635.62	1127	2177	282	1353.62		18	4.003	1095.53	525	1399	663	432.534		18	4.003	702.101	529	1225	421	281.101
								interface average	1353.62							interface average	432.534							interface average	281.101
		ROI2	18	4.003	1325.14	919	1753		1043.14		18	4.003	1037.99	394	1354		374.989		18	4.003	1223.74	455	2235		802.744
								interface average	1043.14							interface average	374.989							interface average	802.744
		ROI3	18	4.003	1186.22	803	1568		904.222		18	4.003	1097.57	961	1273		434.566		18	4.003	841.83	590	1149		420.83
								interface average	904.222							interface average	434.566							interface average	420.83
	Cytosol	ROI1	13	4.003	665.984	397	1132		383.984		13	4.003	1053.52	833	1253		390.517		13	4.003	2119.43	1059	2819		1698.43
			14	4.003	642.087	407	1123		360.087		14	4.003	1013.47	808	1219		350.468		14	4.003	2162.11	869	3068		1741.11
								Cytosol average	372.036							Cytosol average	370.493							Cysotol average	1719.77
		ROI2	13	4.003	686.573	550	845		404.573		13	4.003	1080.16	945	1272		417.16		13	4.003	1455.56	576	2407		1034.56
			14	4.003	655.18	536	802		373.18		14	4.003	1073.77	920	1252		410.774		14	4.003	1520.75	524	2572		1099.75
								Cytosol average	388.876							Cytosol average	413.967							Cysotol average	1067.15
		ROI3	13	4.003	769.778	484	1507		487.778		13	4.003	971.092	657	1275		308.092		13	4.003	646.164	468	1039		225.164
			14	4.003	694.643	424	1336		412.643		14	4.003	889.434	651	1155		226.434		14	4.003	654.948	455	932		233.948
								Cytosol average	450.211							Cytosol average	267.263							Cysotol average	229.556
	DMSO2 cell2, averaged 10pixel
			Channel1 - ELKS	Area	Mean	Min	Max	Background	Mean (Background subtracted)		Channel 2 - Liprin	Area	Mean	Min	Max	Background	Background Subtracted		Channel 3 - Insulin	Area	Mean	Min	Max	Background	Background subtracted
			Z								Z								Z
	ECM-cell interface	ROI1	18	4.003	1256.42	724	1846	267	989.421		18	4.003	914.137	475	1281	577	337.137		18	4.003	791.98	494	1248	354	437.98
								interface average	989.421							interface average	337.137							interface average	437.98
		ROI2	18	4.003	1513.8	605	2351		1246.8		18	4.003	999.896	709	1181		422.896		18	4.003	429.853	321	653		75.853
								interface average	1246.8							interface average	422.896							interface average	75.853
		ROI3	18	4.003	1296.52	722	1875		1029.52		18	4.003	935.578	824	1029		358.578		18	4.003	665.772	489	953		311.772
								interface average	1029.52							interface average	358.578							interface average	311.772
	Cytosol	ROI1	14	4.003	1091.48	490	1536		824.476		14	4.003	815.23	589	1178		238.23		14	4.003	815.41	381	1270		461.41
			15	4.003	1136.69	618	1511		869.689		15	4.003	789.999	573	1112		212.999		15	4.003	744.262	343	1264		390.262
								Cytosol average	847.083							Cytosol average	225.615							Cysotol average	425.836
		ROI2	14	4.003	718.978	435	1604		451.978		14	4.003	884.677	638	1155		307.677		14	4.003	1921.74	1146	2497		1567.74
			15	4.003	719.554	395	1505		452.554		15	4.003	919.481	688	1065		342.481		15	4.003	1978.35	983	2852		1624.35
								Cytosol average	452.266							Cytosol average	325.079							Cysotol average	1596.04
		ROI3	14	4.003	796.327	574	1215		529.327		14	4.003	927.427	672	1256		350.427		14	4.003	529.809	291	795		175.809
			15	4.003	825.826	615	1180		558.826		15	4.003	832.251	588	1043		255.251		15	4.003	599.015	370	884		245.015
								Cytosol average	544.077							Cytosol average	302.839							Cysotol average	210.412
	DMSO2 cell3, averaged 10pixel
			Channel1 - ELKS	Area	Mean	Min	Max	Background	Mean (Background subtracted)		Channel 2 - Liprin	Area	Mean	Min	Max	Background	Background Subtracted		Channel 3 - Insulin	Area	Mean	Min	Max	Background	Background subtracted
			Z								Z								Z
	ECM-cell interface	ROI1	18	4.003	1482.37	883	2105	318	1164.37		18	4.003	1045.43	793	1277	641	225		18	4.003	648.643	442	977	398	250.643
								interface average	1164.37							interface average	225							interface average	250.643
		ROI2	18	4.003	1260.35	404	2181		942.348		18	4.003	1001.42	888	1113		360.424		18	4.003	734.694	365	1043		336.694
								interface average	942.348							interface average	360.424							interface average	336.694
		ROI3	18	4.003	1502.47	502	2351		1184.47		18	4.003	945.495	513	1189		304.495		18	4.003	956.519	390	1650		558.519
								interface average	1184.47							interface average	304.495							interface average	558.519
	Cytosol	ROI1	12	4.003	661.135	342	1080		343.135		12	4.003	1049.86	818	1164		408.861		12	4.003	979.049	418	1562		581.049
			13	4.003	660.157	335	1038		342.157		13	4.003	963.28	756	1094		322.28		13	4.003	956.231	336	1515		558.231
								Cytosol average	342.646							Cytosol average	365.571							Cysotol average	569.64
		ROI2	12	4.003	1203.96	694	1858		885.961		12	4.003	1033.01	906	1284		392.011		12	4.003	1548.06	648	2398		1150.06
			13	4.003	1085.33	573	1823		767.333		13	4.003	1002.95	872	1284		361.952		13	4.003	1601.78	626	2393		1203.78
								Cytosol average	826.647							Cytosol average	376.981							Cysotol average	1176.92
		ROI3	12	4.003	908.456	465	1216		590.456		12	4.003	1034.46	851	1240		393.459		12	4.003	953.684	652	1164		555.684
			13	4.003	869.416	412	1351		551.416		13	4.003	943.591	733	1220		302.591		13	4.003	1051.85	675	1383		653.845
								Cytosol average	570.936							Cytosol average	348.025							Cysotol average	604.764
